# Supplementary material
Source: publisher figshare collection journal article supplement (https://acs.figshare.com/ndownloader/files/4096624)
Supplement: Supplementary file 1 [file 4096624]

*Supporting Information for*

Enantioselective Synthesis of Planar Chiral Ferrocenes *via*  
Palladium-catalyzed Direct Coupling with Aryl Boronic Acids

De-Wei Gao, Yan-Chao Shi, Qing Gu,\* Zheng-Le Zhao, and Shu-Li You\*

State Key Laboratory of Organometallic Chemistry, Shanghai Institute of Organic Chemistry,  
Chinese Academy of Sciences, 345 Lingling Lu, Shanghai 200032, P. R. of China  
Fax (+86) 21-54925087; E-mail: qinggu@sioc.ac.cn or slyou@sioc.ac.cn

**Table of Contents**

|                                                                       |     |
|-----------------------------------------------------------------------|-----|
| General Methods                                                       | S2  |
| Complete optimization data                                            | S2  |
| Monitoring kinetic resolution effect of bispenylation                 | S4  |
| Enantioselective synthesis of planar chiral ferrocene                 | S4  |
| Determination of the absolute configuration of product <b>3a</b>      | S12 |
| Synthesis of <b>L1</b> and Pd-catalyzed asymmetric allylic alkylation | S14 |
| References                                                            | S16 |
| Copies of NMR and HPLC spectra                                        | S17 |

**General Methods.** Unless stated otherwise, all reactions were carried out in flame-dried glassware under a dry argon atmosphere. All solvents were purified and dried according to standard methods prior to use.  $^1\text{H}$  and  $^{13}\text{C}$  NMR spectra were recorded on a Varian instrument (300 MHz and 75 MHz, 400 MHz and 100 MHz, respectively) and internally referenced to tetramethylsilane signal or residual protio solvent signals. Data for  $^1\text{H}$  NMR are recorded as follows: chemical shift ( $\delta$ , ppm), multiplicity (s = singlet, d = doublet, t = triplet, m = multiplet or unresolved, br = broad singlet, coupling constant(s) in Hz, integration). Data for  $^{13}\text{C}$  NMR are reported in terms of chemical shift ( $\delta$ , ppm).

Compounds **1a-d**<sup>1-3</sup> were prepared by reductive amination of ferrocene aldehyde with the corresponding amines. (*S*, *R*<sub>p</sub>)-**7** was prepared according to the reported procedure.<sup>4</sup>

## Complete optimization data

**Table 1.** Examination of oxidants<sup>a</sup>

| <p>Reaction scheme: Ferrocene aldehyde <b>1a</b> (with <math>\text{NMe}_2</math> group) reacts with benzaldehyde <b>2a</b> (<math>\text{PhB(OH)}_2</math>) in the presence of <math>\text{Pd(OAc)}_2</math> (10 mol %), <math>\text{Boc-L-Val-OH}</math> (20 mol %), <math>\text{K}_2\text{CO}_3</math> (1 equiv), TBAB (0.25 equiv), in DMA at 80 °C for 4 h, to yield ferrocene products <b>3a</b> and <b>3a'</b>.</p> |                          |                            |                        |                     |
|--------------------------------------------------------------------------------------------------------------------------------------------------------------------------------------------------------------------------------------------------------------------------------------------------------------------------------------------------------------------------------------------------------------------------|--------------------------|----------------------------|------------------------|---------------------|
| entry                                                                                                                                                                                                                                                                                                                                                                                                                    | oxidant                  | <b>3a:3a'</b> <sup>b</sup> | yield (%) <sup>c</sup> | ee (%) <sup>d</sup> |
| <b>1</b>                                                                                                                                                                                                                                                                                                                                                                                                                 | <b>Air</b>               | <b>8.3:1</b>               | <b>74<sup>c</sup></b>  | <b>98</b>           |
| 2                                                                                                                                                                                                                                                                                                                                                                                                                        | $\text{Ag}_2\text{O}$    | -                          | 7                      | -                   |
| 3                                                                                                                                                                                                                                                                                                                                                                                                                        | $\text{AgOAc}$           | -                          | < 5                    | -                   |
| 4                                                                                                                                                                                                                                                                                                                                                                                                                        | $\text{Ag}_2\text{CO}_3$ | -                          | 15                     | -                   |
| 5                                                                                                                                                                                                                                                                                                                                                                                                                        | $\text{Ag}_3\text{PO}_4$ | -                          | 15                     | -                   |
| 6                                                                                                                                                                                                                                                                                                                                                                                                                        | $\text{Cu(OAc)}_2$       | -                          | 14                     | -                   |
| 7                                                                                                                                                                                                                                                                                                                                                                                                                        | $\text{Cu(OTf)}_2$       | -                          | 24                     | -                   |
| 8 <sup>e</sup>                                                                                                                                                                                                                                                                                                                                                                                                           | $\text{O}_2$             | 15:1                       | 69(80)                 | 95                  |

<sup>a</sup> Reaction conditions: **1a** (0.2 mmol), **2a** (0.4 mmol),  $\text{Pd(OAc)}_2$  (10 mol %),  $\text{Boc-L-Val-OH}$  (20 mol %),  $\text{K}_2\text{CO}_3$  (1 equiv), TBAB (0.25 equiv) and oxidant (2 equiv for entries 2-7) in DMA at 80 °C. <sup>b</sup> Determined by  $^1\text{H}$  NMR with  $\text{CH}_2\text{Br}_2$  as an internal standard. <sup>c</sup> Isolated yield. <sup>d</sup> Ee of **3a** was determined by HPLC analysis. <sup>e</sup> Oxygen balloon was used.

**Table 2.** Examination of base and solvent<sup>a</sup>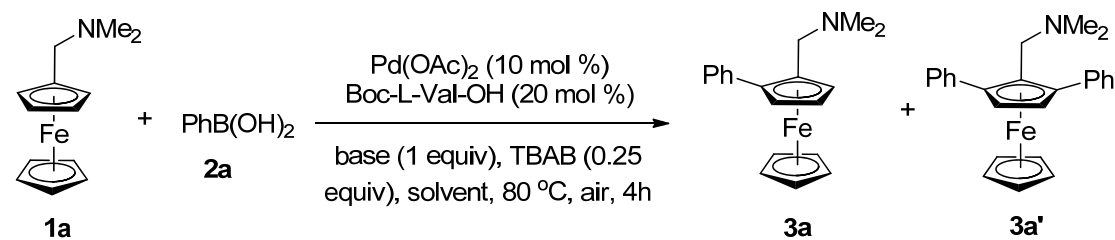

| entry    | solvent            | base                               | <b>3a:3a'</b> <sup>b</sup> | yield (%) <sup>c</sup> | ee (%) <sup>d</sup> |
|----------|--------------------|------------------------------------|----------------------------|------------------------|---------------------|
| <b>1</b> | <b>DMA</b>         | <b>K<sub>2</sub>CO<sub>3</sub></b> | <b>8.3:1</b>               | <b>74</b>              | <b>98</b>           |
| 2        | DMA                | KHCO <sub>3</sub>                  | 9.5:1                      | 46 <sup>b</sup>        | -                   |
| 3        | DMA                | Na <sub>2</sub> CO <sub>3</sub>    | 8:1                        | 24 <sup>b</sup>        | -                   |
| 4        | DMA                | NaOAc                              | 5.6:1                      | 23 <sup>b</sup>        | -                   |
| 5        | DMA                | Cs <sub>2</sub> CO <sub>3</sub>    | 7.7:1                      | 70                     | 99                  |
| 6        | DMF                | K <sub>2</sub> CO <sub>3</sub>     | 22:1                       | 39                     | 97                  |
| 7        | 2-methyl-2-butanol | K <sub>2</sub> CO <sub>3</sub>     | 4.3:1                      | 12 <sup>b</sup>        | -                   |
| 8        | NMP                | K <sub>2</sub> CO <sub>3</sub>     | 20:1                       | 55                     | 92                  |

<sup>a</sup> Reaction conditions: **1a** (0.2 mmol), **2a** (0.4 mmol),  $\text{Pd}(\text{OAc})_2$  (10 mol %), Boc-L-Val-OH (20 mol %), base (1 equiv), TBAB (0.25 equiv) in 1.5 mL solvent at 80 °C. <sup>b</sup> Determined by <sup>1</sup>H NMR with CH<sub>2</sub>Br<sub>2</sub> as an internal standard. <sup>c</sup> Isolated yield. <sup>d</sup> Ee of **3a** was determined by HPLC analysis.

**Table 3.** Examination of the amount of phenylboronic acid, catalyst loading and temperature<sup>a</sup>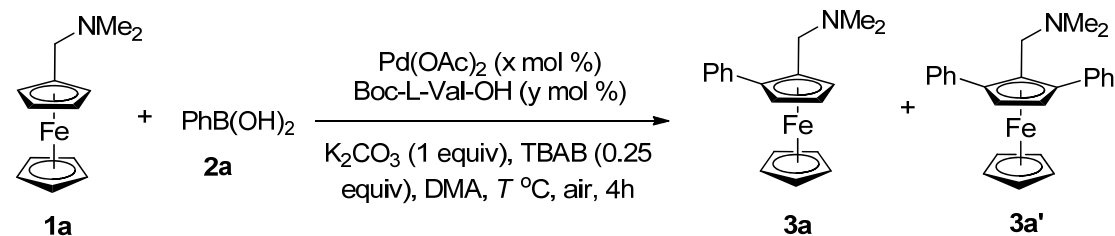

| entry | equiv of <b>2a</b> | x   | y  | T (°C) | <b>3a:3a'</b> <sup>b</sup> | yield (%) <sup>c</sup> | ee (%) <sup>d</sup> |
|-------|--------------------|-----|----|--------|----------------------------|------------------------|---------------------|
| 1     | 1.1                | 10  | 20 | 80     | 25:1                       | 60                     | 97                  |
| 2     | 1.5                | 10  | 20 | 80     | 8.3:1                      | 71                     | 98                  |
| 3     | 2                  | 10  | 20 | 80     | 8.3:1                      | 74                     | 98                  |
| 4     | 3                  | 10  | 20 | 80     | 9.5:1                      | 23                     | 90                  |
| 5     | 2                  | 5   | 10 | 60     | 33:1                       | 45                     | 97                  |
| 6     | 2                  | 2.5 | 5  | 60     | -                          | 29                     | 95                  |
| 7     | 2                  | 1   | 2  | 60     | -                          | 9 <sup>b</sup>         | -                   |
| 8     | 2                  | 10  | 11 | 60     | 12:1                       | 71                     | 96                  |

<sup>a</sup> Reaction conditions: **1a** (0.2 mmol), **2a**,  $\text{Pd}(\text{OAc})_2$  (x mol %), Boc-L-Val-OH (y mol %), K<sub>2</sub>CO<sub>3</sub> (1 equiv), TBAB (0.25 equiv) in 1.5 mL DMA under air. <sup>b</sup> Determined by <sup>1</sup>H NMR with CH<sub>2</sub>Br<sub>2</sub> as an internal standard. <sup>c</sup> Isolated yield. <sup>d</sup> Ee of **3a** was determined by HPLC analysis.

**Table 4.** Monitoring kinetic resolution effect of bisphenylation<sup>a</sup>

| 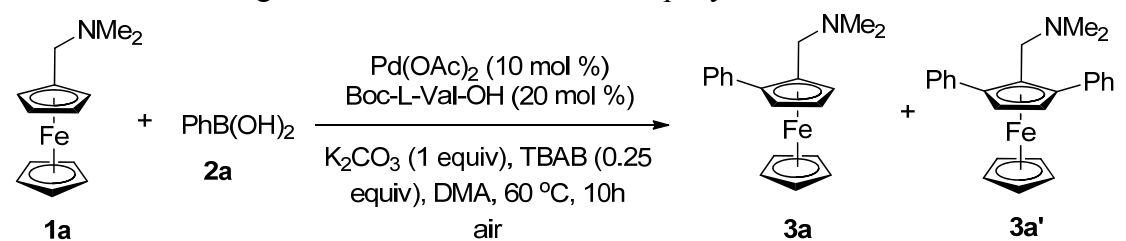 |          |                            |                                  |
|------------------------------------------------------------------------------------|----------|----------------------------|----------------------------------|
| entry                                                                              | time (h) | <b>3a:3a'</b> <sup>b</sup> | ee of <b>3a</b> (%) <sup>c</sup> |
| 1                                                                                  | 2        | 33:1                       | 94                               |
| 2                                                                                  | 4        | 28:1                       | 95                               |
| 3                                                                                  | 6        | 17:1                       | 98                               |
| 4                                                                                  | 8        | 9:1                        | 99                               |
| 5                                                                                  | 10       | 7:1                        | 99                               |

<sup>a</sup> Reaction conditions: **1a** (0.2 mmol), **2a** (0.4 mmol), Pd(OAc)<sub>2</sub> (10 mol %), Boc-L-Val-OH (20 mol %), K<sub>2</sub>CO<sub>3</sub> (1 equiv), TBAB (0.25 equiv) in 1.5 mL DMA under air at 60 °C. The ratio of **3a/3a'** and ee of **3a** were determined every two hours. <sup>b</sup> Determined by <sup>1</sup>H NMR analysis. <sup>c</sup> Determined by HPLC analysis.

#### General procedure for the enantioselective synthesis of planar chiral ferrocene

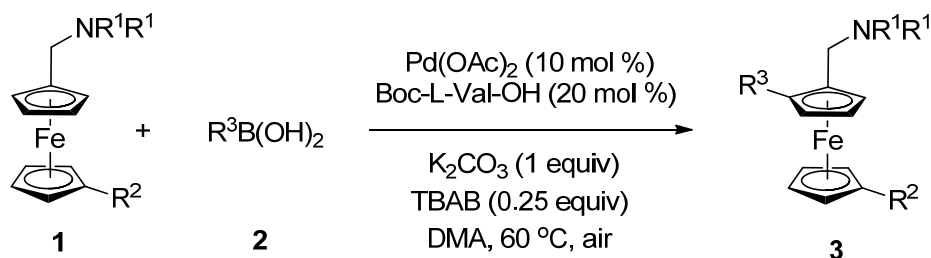

To a solution of boronic acid **2** (0.4 mmol) in DMA (1.5 mL) was added Boc-L-Val-OH (8.7 mg, 0.04 mmol), Pd(OAc)<sub>2</sub> (4.5 mg, 0.02 mmol), K<sub>2</sub>CO<sub>3</sub> (27.6 mg, 0.2 mmol), TBAB (tetrabutyl ammonium bromide) (16.1 mg, 0.05 mmol) and ferrocene **1** (0.2 mmol) successively. The mixture was stirred at 60 °C under air (open flask). After the reaction was complete (monitored by TLC), it was then quenched with saturated aqueous NaHCO<sub>3</sub> solution and extracted with EtOAc three times. The combined organic layers were washed with H<sub>2</sub>O and brine successively, then dried over anhydrous Na<sub>2</sub>SO<sub>4</sub> and filtrated. After the solvent was removed under reduced pressure, the residue was purified by column chromatography (ethyl acetate/petroleum ether = 1/10, v/v, 2% Et<sub>3</sub>N) to afford desired product **3**.

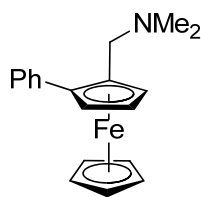

(*S<sub>p</sub>*)-1-Dimethylaminomethyl-2-phenyl ferrocene (**3a**)

Yellow oil (50.7 mg, 79% yield, 98% *ee*). Analytical data for **3a**:  $[\alpha]_{\text{D}}^{20} = +182.3^\circ$  (*c* = 0.25 Acetone, 98% *ee*).  $^1\text{H}$  NMR (400 MHz,  $\text{CDCl}_3$ )  $\delta$  2.17 (s, 6H), 3.15 (AB,  $J_{AB} = 12.8$  Hz, 1H), 3.64 (BA,  $J_{BA} = 12.8$  Hz, 1H), 4.05 (s, 5H), 4.23-4.24 (m, 1H), 4.30-4.31 (m, 1H), 4.46-4.47 (m, 1H), 7.23-7.30 (m, 1H), 7.31-7.34 (m, 2H), 7.70-7.73 (m, 2H);  $^{13}\text{C}$  NMR (100 MHz,  $\text{CDCl}_3$ )  $\delta$  45.0, 57.9, 67.1, 69.9, 70.0, 71.5, 82.2, 88.1, 126.0, 127.9, 129.3, 138.9; IR (film) 3070, 2932, 2762, 1725, 1600, 1452, 1357, 1255, 1171, 1105, 1014, 816, 761, 697  $\text{cm}^{-1}$ ; HRMS (ESI) exact mass calcd for ( $\text{C}_{19}\text{H}_{21}\text{NFe}$ ) requires *m/z* 317.1065, found *m/z* 317.1073. The enantiomeric excess was determined by phenomenex cellulose-4 (25 cm), Hexanes / IPA = 29 / 1, 0.3 mL/min,  $\lambda = 254$  nm, *t* (minor) = 15.35 min, *t* (major) = 15.93 min.

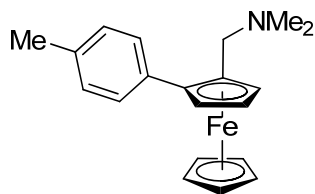

(*S<sub>p</sub>*)-1-Dimethylaminomethyl-2-(4-methylphenyl) ferrocene (**3b**)

Yellow oil (47.0 mg, 70% yield, 97% *ee*). Analytical data for **3b**:  $[\alpha]_{\text{D}}^{20} = +157.9^\circ$  (*c* = 0.25 Acetone, 97% *ee*).  $^1\text{H}$  NMR (400 MHz,  $\text{CDCl}_3$ )  $\delta$  2.16 (s, 6H), 2.34 (s, 3H), 3.15 (AB,  $J_{AB} = 12.4$  Hz, 1H), 3.63 (BA,  $J_{BA} = 12.4$  Hz, 1H), 4.03 (s, 5H), 4.19-4.21 (m, 1H), 4.27-4.28 (m, 1H), 4.42-4.43 (m, 1H), 7.12 (d,  $J = 8.0$  Hz, 2H), 7.59 (d,  $J = 8.0$  Hz, 2H);  $^{13}\text{C}$  NMR (100 MHz,  $\text{CDCl}_3$ )  $\delta$  21.1, 45.0, 57.8, 66.9, 69.6, 69.9, 71.3, 82.0, 88.3, 128.6, 129.2, 135.5, 135.6; IR (film) 3092, 2935, 2811, 2762, 1726, 1524, 1454, 1301, 1258, 1173, 1105, 1016, 815, 721  $\text{cm}^{-1}$ ; HRMS (ESI) exact mass calcd for ( $\text{C}_{20}\text{H}_{23}\text{NFe}$ ) requires *m/z* 331.1221, found *m/z* 331.1213. The enantiomeric excess was determined by phenomenex cellulose-4 (25 cm), Hexanes / IPA = 29 / 1, 0.3 mL/min,  $\lambda = 254$  nm, *t* (minor) = 14.36 min, *t* (major) = 15.40 min.

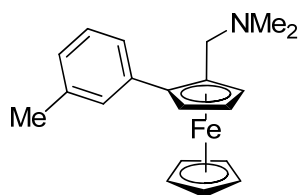

(*S<sub>p</sub>*)-1-Dimethylaminomethyl-2-(3-methylphenyl) ferrocene (**3c**)

Yellow oil (54.3 mg, 81% yield, 99% *ee*). Analytical data for **3c**:  $[\alpha]_{\text{D}}^{20} = +168.1^{\circ}$  (*c* = 0.25 Acetone, 99% *ee*).  $^1\text{H}$  NMR (400 MHz,  $\text{CDCl}_3$ )  $\delta$  2.19 (s, 6H), 2.39 (s, 3H), 3.15 (AB,  $J_{AB} = 12.4$  Hz, 1H), 3.65 (BA,  $J_{BA} = 12.4$  Hz, 1H), 4.06 (s, 5H), 4.06-4.23 (m, 1H), 4.30-4.31 (m, 1H), 4.46-4.47 (m, 1H), 7.05 (d,  $J = 7.6$  Hz, 1H), 7.21-7.24 (m, 1H), 7.52-7.54 (m, 2H);  $^{13}\text{C}$  NMR (100 MHz,  $\text{CDCl}_3$ )  $\delta$  21.5, 44.9, 57.8, 66.9, 69.8, 69.9, 71.3, 82.1, 88.2, 126.4, 126.8, 127.7, 130.0, 137.2, 138.7; IR (film) 3093, 2936, 2811, 2762, 1727, 1605, 1499, 1454, 1354, 1258, 1173, 1105, 1020, 1000, 807, 785, 705  $\text{cm}^{-1}$ ; HRMS (ESI) exact mass calcd for ( $\text{C}_{20}\text{H}_{23}\text{NFe}$ ) requires  $m/z$  331.1221, found  $m/z$  331.1214. The enantiomeric excess was determined by Daicel Chiralcel OD-H (25 cm), Hexanes / IPA = 29 / 1, 0.3 mL/min,  $\lambda = 254$  nm, *t* (minor) = 14.95 min, *t* (major) = 16.31 min.

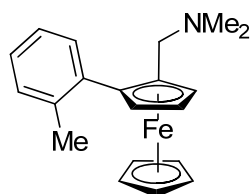

(*S<sub>p</sub>*)-1-Dimethylaminomethyl-2-(2-methylphenyl) ferrocene (**3d**)

Yellow oil (22.4 mg, 33% yield, 94% *ee*). Analytical data for **3d**:  $[\alpha]_{\text{D}}^{20} = -128.1^{\circ}$  (*c* = 0.25 Acetone, 94% *ee*).  $^1\text{H}$  NMR (400 MHz,  $\text{CDCl}_3$ )  $\delta$  1.91 (s, 6H), 2.15 (s, 3H), 3.21 (AB,  $J_{AB} = 12.8$  Hz, 1H), 3.47 (BA,  $J_{BA} = 12.8$  Hz, 1H), 4.19 (s, 5H), 4.28-4.31 (m, 2H), 4.39-4.30 (m, 1H), 7.14-7.25 (m, 3H), 7.82-7.84 (m, 1H);  $^{13}\text{C}$  NMR (100 MHz,  $\text{CDCl}_3$ )  $\delta$  20.7, 30.9, 44.3, 56.1, 66.5, 69.2, 69.7, 83.8, 90.0, 124.9, 126.6, 129.8, 132.9, 136.0, 137.7; IR (film) 3093, 2926, 2812, 2763, 2322, 1676, 1498, 1454, 1247, 1175, 1106, 1018, 1001, 814, 762, 726  $\text{cm}^{-1}$ ; HRMS (ESI) exact mass calcd for ( $\text{C}_{20}\text{H}_{23}\text{NFe}$ ) requires  $m/z$  331.1221, found  $m/z$  331.1216. The enantiomeric excess was determined by Daicel Chiralcel OD-H (25 cm), Hexanes / IPA = 29 / 1, 0.3

mL/min,  $\lambda = 254$  nm, t (major) = 16.13 min, t (minor) = 17.49 min.

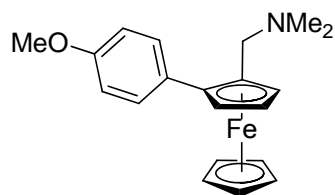

(*S<sub>p</sub>*)-1-Dimethylaminomethyl-2-(4-methoxyphenyl) ferrocene (**3e**)

Yellow oil (59% yield, 96% *ee*). Analytical data for **3e**:  $[\alpha]_D^{20} = +173.5^\circ$  (*c* = 0.25 Acetone, 96% *ee*).  $^1\text{H}$  NMR (400 MHz,  $\text{CDCl}_3$ )  $\delta$  2.15 (s, 6H), 3.12 (AB,  $J_{AB} = 12.4$  Hz, 1H), 3.61 (BA,  $J_{BA} = 12.4$  Hz, 1H), 3.82 (s, 3H), 4.03 (s, 5H), 4.18-4.19 (m, 1H), 4.25-4.26 (m, 1H), 4.39-4.40 (m, 1H), 6.85-6.88 (m, 2H), 7.62-7.65 (m, 2H);  $^{13}\text{C}$  NMR (100 MHz,  $\text{CDCl}_3$ )  $\delta$  45.0, 55.2, 57.9, 66.8, 69.5, 69.9, 71.2, 82.0, 88.3, 113.3, 130.3, 130.9, 158.0; IR (film) 3092, 2934, 2812, 2764, 1610, 1574, 1521, 1455, 1364, 1288, 1244, 1176, 1105, 1034, 830  $\text{cm}^{-1}$ ; HRMS (ESI) exact mass calcd for ( $\text{C}_{20}\text{H}_{23}\text{NOFe}$ ) requires  $m/z$  347.1170, found  $m/z$  347.1162. The enantiomeric excess was determined by phenomenex cellulose-4 (25 cm), Hexanes / IPA = 29 / 1, 0.3 mL/min,  $\lambda = 254$  nm, t (minor) = 18.79 min, t (major) = 20.32 min.

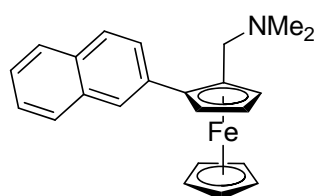

(*S<sub>p</sub>*)-1-Dimethylaminomethyl-2-(2-naphthyl) ferrocene (**3f**)

Yellow oil (55.8 mg, 75% yield, 96% *ee*). Analytical data for **3f**:  $[\alpha]_D^{20} = -42.6^\circ$  (*c* = 0.25 Acetone, 96% *ee*).  $^1\text{H}$  NMR (400 MHz,  $\text{CDCl}_3$ )  $\delta$  2.24 (s, 6H), 3.15 (AB,  $J_{AB} = 12.4$  Hz, 1H), 3.73 (BA,  $J_{BA} = 12.4$  Hz, 1H), 4.05 (s, 5H), 4.27-4.28 (m, 1H), 4.33-4.34 (m, 1H), 4.58-4.59 (m, 1H), 7.41-7.47 (m, 2H), 7.78-7.84 (m, 4H), 8.24 (s, 1H);  $^{13}\text{C}$  NMR (100 MHz,  $\text{CDCl}_3$ )  $\delta$  45.1, 58.2, 67.4, 70.0, 70.1, 71.9, 82.3, 87.8, 125.4, 126.0, 127.2, 127.3, 127.6, 127.9, 128.0, 132.0, 133.5, 136.4; IR (film) 3090, 2934, 2852, 2811, 2763, 1724, 1628, 1599, 1508, 1454, 1354, 1253, 1173, 1104, 1016, 999, 963, 813, 746  $\text{cm}^{-1}$ ; HRMS (ESI) exact mass calcd for ( $\text{C}_{23}\text{H}_{23}\text{NFe}$ ) requires  $m/z$

367.1221, found  $m/z$  367.1217. The enantiomeric excess was determined by Daicel Chiralcel OD-H (25 cm), Hexanes / IPA = 29 / 1, 0.3 mL/min,  $\lambda$  = 254 nm,  $t$  (minor) = 16.88 min,  $t$  (major) = 18.28 min.

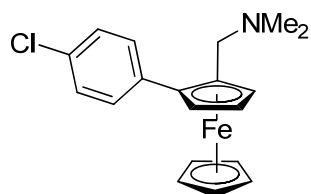

( $S_P$ )-1-Dimethylaminomethyl-2-(4-chlorophenyl) ferrocene (**3g**)

Yellow oil (50.9 mg, 72% yield, 97% *ee*). Analytical data for **3g**:  $[\alpha]_D^{20}$  = +185.7° ( $c$  = 0.25 Acetone, 97% *ee*).  $^1\text{H}$  NMR (300 MHz,  $\text{CDCl}_3$ )  $\delta$  2.19 (s, 6H), 3.09 (AB,  $J_{AB}$  = 12.8 Hz, 1H), 3.61 (BA,  $J_{BA}$  = 12.8 Hz, 1H), 4.04 (s, 5H), 4.04-4.25 (m, 1H), 4.30-4.31 (m, 1H), 4.46-4.47 (m, 1H), 7.27-7.30 (m, 2H), 7.68-7.71 (m, 2H);  $^{13}\text{C}$  NMR (100 MHz,  $\text{CDCl}_3$ )  $\delta$  45.0, 58.0, 67.3, 70.0, 70.1, 71.9, 82.1, 86.8, 128.1, 130.4, 131.6, 137.6; IR (film) 3092, 2936, 2812, 2765, 1725, 1503, 1454, 1257, 1174, 1091, 1014, 971, 817, 726  $\text{cm}^{-1}$ ; HRMS (ESI) exact mass calcd for ( $\text{C}_{19}\text{H}_{20}\text{NClFe}$ ) requires  $m/z$  351.0675, found  $m/z$  351.0668. The enantiomeric excess was determined by phenomenex cellulose-4 (25 cm), Hexanes / IPA = 29 / 1, 0.3 mL/min,  $\lambda$  = 254 nm,  $t$  (minor) = 13.94 min,  $t$  (major) = 14.70 min.

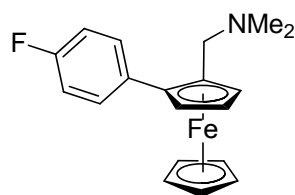

( $S_P$ )-1-Dimethylaminomethyl-2-(4-fluorophenyl) ferrocene (**3h**)

Yellow oil (37.5 mg, 55% yield, 97% *ee*). Analytical data for **3h**:  $[\alpha]_D^{20}$  = +153.1° ( $c$  = 0.25 Acetone, 97% *ee*).  $^1\text{H}$  NMR (400 MHz,  $\text{CDCl}_3$ )  $\delta$  2.16 (s, 6H), 3.09 (AB,  $J_{AB}$  = 12.8 Hz, 1H), 3.68 (BA,  $J_{BA}$  = 12.8 Hz, 1H), 4.03 (s, 5H), 4.20-4.21 (m, 1H), 4.26-4.27 (m, 1H), 4.41-4.42 (m, 1H), 6.97-7.02 (m, 2H), 7.68-7.72 (m, 2H);  $^{13}\text{C}$  NMR (100 MHz,  $\text{CDCl}_3$ )  $\delta$  45.0, 57.9, 67.0, 69.9, 70.0, 71.6, 82.1, 87.3, 114.7 (d,  $J$  = 21.0 Hz), 130.6 (d,  $J$  = 7.2 Hz), 134.7 (d,  $J$  = 3.2 Hz), 161.3 (d,  $J$  = 243.6 Hz);  $^{19}\text{F}$  NMR (376 MHz,  $\text{CDCl}_3$ )  $\delta$  -116.8; IR (film) 3093, 2935, 2813, 2766, 1604, 1519,



1455, 1364, 1301, 1221, 1159, 1105, 1016, 811  $\text{cm}^{-1}$ ; HRMS (ESI) exact mass calcd for  $(\text{C}_{19}\text{H}_{20}\text{NFFe})$  requires  $m/z$  335.0970, found  $m/z$  335.0961. The enantiomeric excess was determined by phenomenex cellulose-4 (25 cm), Hexanes / IPA = 29 / 1, 0.3 mL/min,  $\lambda$  = 254 nm,  $t$  (minor) = 14.23 min,  $t$  (major) = 15.06 min.

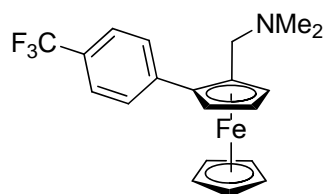

**(*S<sub>p</sub>*)-1-Dimethylaminomethyl-2-(4-trifluoromethylphenyl) ferrocene (**3i**)**

Yellow oil (47.0 mg, 61% yield, 94% *ee*). Analytical data for **3i**:  $[\alpha]_{\text{D}}^{20}$  = +198.1° ( $c$  = 0.25 Acetone, 94% *ee*).  $^1\text{H}$  NMR (400 MHz,  $\text{CDCl}_3$ )  $\delta$  2.21 (s, 6H), 3.09 (AB,  $J_{AB}$  = 12.8 Hz, 1H), 3.63 (BA,  $J_{BA}$  = 12.8 Hz, 1H), 4.05 (s, 5H), 4.28-4.30 (m, 1H), 4.34-4.35 (m, 1H), 4.4-4.55 (m, 1H), 7.56 (d,  $J$  = 8.0 Hz, 2H), 7.88 (d,  $J$  = 8.0 Hz, 2H);  $^{13}\text{C}$  NMR (100 MHz,  $\text{CDCl}_3$ )  $\delta$  45.0, 58.0, 67.6, 70.2, 70.6, 72.4, 82.2, 85.9, 124.4 (q,  $J$  = 270.7 Hz), 124.8 (q,  $J$  = 3.8 Hz), 127.7 (q,  $J$  = 31.6 Hz), 129.1, 143.4 (q,  $J$  = 1.3 Hz).  $^{19}\text{F}$  NMR (376 MHz,  $\text{CDCl}_3$ )  $\delta$  -62.3; IR (film) 3094, 2767, 2330, 1615, 1529, 1456, 1409, 1322, 1258, 1160, 1117, 1069, 1016, 973, 819, 689, 655  $\text{cm}^{-1}$ ; HRMS (ESI) exact mass calcd for  $(\text{C}_{20}\text{H}_{20}\text{NF}_3\text{Fe})$  requires  $m/z$  385.0939, found  $m/z$  385.0930. The enantiomeric excess was determined by phenomenex cellulose-4 (25 cm), Hexanes / IPA = 98 / 2, 0.3 mL/min,  $\lambda$  = 210 nm,  $t$  (minor) = 13.08 min,  $t$  (major) = 13.74 min.

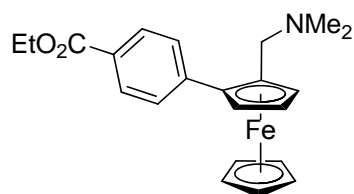

**(*S<sub>p</sub>*)-1-Dimethylaminomethyl-2-(4-ethoxycarbonylphenyl) ferrocene (**3j**)**

Yellow oil (56.3 mg, 72% yield, 95% *ee*). Analytical data for **3j**:  $[\alpha]_{\text{D}}^{20}$  = +207.9° ( $c$  = 0.25 Acetone, 95% *ee*).  $^1\text{H}$  NMR (400 MHz,  $\text{CDCl}_3$ )  $\delta$  1.39 (t,  $J$  = 7.2 Hz, 3H), 2.17 (s, 6H), 3.08 (AB,  $J_{AB}$  = 12.8 Hz, 1H), 3.62 (BA,  $J_{BA}$  = 12.8 Hz, 1H), 4.01 (s, 5H), 4.26-4.28 (m, 1H), 4.32-4.33 (m, 1H), 4.37 (q,  $J$  = 7.2 Hz, 2H), 4.52-4.54 (m, 1H),

7.79 (d,  $J = 8.4$  Hz, 2H), 7.97 (d,  $J = 8.4$  Hz, 2H);  $^{13}\text{C}$  NMR (100 MHz,  $\text{CDCl}_3$ )  $\delta$  14.4, 45.0, 58.1, 60.8, 67.8, 70.3, 70.6, 72.5, 82.3, 86.2, 127.8, 128.8, 129.2, 144.8, 166.7; IR (film) 2976, 2935, 2855, 2813, 1709, 1606, 1520, 1456, 1365, 1269, 1175, 1098, 1018, 817, 774, 709  $\text{cm}^{-1}$ ; HRMS (ESI) exact mass calcd for  $(\text{C}_{22}\text{H}_{25}\text{NO}_2\text{Fe})$  requires  $m/z$  389.1276, found  $m/z$  389.1265. The enantiomeric excess was determined by Diacel Chiralcel OD-H (25 cm), Hexanes / IPA = 29 / 1, 0.3 mL/min,  $\lambda = 254$  nm,  $t$  (major) = 19.35 min,  $t$  (minor) = 22.20 min.

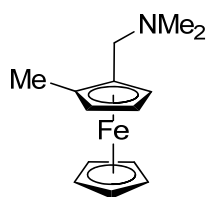

**( $S_p$ )-1-Dimethylaminomethyl-2-methyl ferrocene (**3k**)**

Yellow oil (7.3 mg, 14% yield). Analytical data for **3k**:  $[\alpha]_{\text{D}}^{20} = -40.0^\circ$  ( $c = 0.25$  Acetone).  $^1\text{H}$  NMR (400 MHz,  $\text{CDCl}_3$ )  $\delta$  1.99 (s, 3H), 2.18 (s, 6H), 3.27 (AB,  $J_{AB} = 12.8$  Hz, 1H), 3.36 (BA,  $J_{BA} = 12.8$  Hz, 1H), 3.99 (t,  $J = 2.8$  Hz, 1H), 4.01 (s, 5H), 4.06 (t,  $J = 1.6$  Hz, 1H), 4.12 (q,  $J = 1.2$  Hz, 1H);  $^{13}\text{C}$  NMR (100 MHz,  $\text{CDCl}_3$ )  $\delta$  13.4, 44.8, 57.2, 65.8, 69.0, 69.5, 69.7, 82.3, 84.0; IR (film) 3402, 3089, 2922, 2473, 2324, 1727, 1633, 1475, 1383, 1262, 1104, 1036 927, 810  $\text{cm}^{-1}$ ; HRMS (ESI) exact mass calcd for  $(\text{C}_{14}\text{H}_{19}\text{NFe})$  requires  $m/z$  255.0908, found  $m/z$  255.0906.

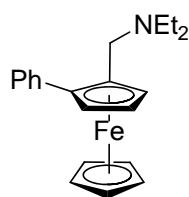

**( $S_p$ )-1-Diethylaminomethyl-2-phenyl ferrocene (**3l**)**

Yellow oil (46.3 mg, 67% yield, 90% *ee*). Analytical data for **3l**:  $[\alpha]_{\text{D}}^{20} = +178.4^\circ$  ( $c = 0.25$  Acetone, 90% *ee*).  $^1\text{H}$  NMR (400 MHz,  $\text{CDCl}_3$ )  $\delta$  0.94 (t,  $J = 7.2$  Hz, 6H), 2.41 (q,  $J = 7.2$  Hz, 2H), 2.53 (q,  $J = 7.2$  Hz, 2H), 3.42 (AB,  $J_{AB} = 13.2$  Hz, 1H), 3.72 (BA,  $J_{BA} = 13.2$  Hz, 1H), 4.06 (s, 5H), 4.21-4.23 (m, 1H), 4.31-4.32 (m, 1H), 4.44-4.45 (m, 1H), 7.22-7.25 (m, 1H), 7.29-7.33 (m, 2H), 7.76-7.79 (m, 2H);  $^{13}\text{C}$  NMR (100 MHz,  $\text{CDCl}_3$ )  $\delta$  11.5, 46.0, 51.4, 66.9, 69.7, 70.0, 71.6, 83.0, 88.4, 126.0, 127.8, 129.6,

138.9; IR (film) 3092, 3057, 2966, 2931, 2792, 2349, 2322, 1601, 1506, 1456, 1369, 1286, 1195, 1167, 1105, 1033, 1000, 807, 763, 700, 650  $\text{cm}^{-1}$ ; HRMS (ESI) exact mass calcd for  $(\text{C}_{21}\text{H}_{25}\text{NFe})$  requires  $m/z$  345.1378, found  $m/z$  345.1370. The enantiomeric excess was determined by phenomenex cellulose-1 (25 cm),  $\text{CH}_3\text{OH}$  / IPA = 9 / 1, 0.7 mL/min,  $\lambda$  = 214 nm,  $t$  (minor) = 5.51 min,  $t$  (major) = 5.85 min.

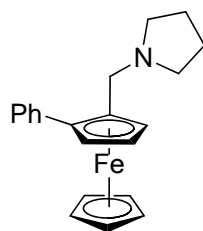

**( $S_p$ )-1-(Pyrrolidin-1-yl-methyl)-2-phenyl ferrocene (**3m**)**

Yellow oil (49.0 mg, 71% yield, 98% *ee*). Analytical data for **3m**:  $[\alpha]_D^{20} = +162.4^\circ$  ( $c$  = 0.25 Acetone, 98% *ee*).  $^1\text{H}$  NMR (400 MHz,  $\text{CDCl}_3$ )  $\delta$  1.71 (t,  $J$  = 6.4 Hz, 4H), 2.44 (t,  $J$  = 8.0 Hz, 4H), 3.33 (AB,  $J_{AB}$  = 12.8 Hz, 1H), 3.83 (BA,  $J_{BA}$  = 12.8 Hz, 1H), 4.05 (s, 5H), 4.22 (t,  $J$  = 2.4 Hz, 1H), 4.33 (t,  $J$  = 2.0 Hz, 1H), 4.45 (t,  $J$  = 2.0 Hz, 1H), 7.23-7.25 (m, 1H), 7.30-7.34 (m, 2H), 7.70-7.72 (m, 2H);  $^{13}\text{C}$  NMR (100 MHz,  $\text{CDCl}_3$ )  $\delta$  23.5, 53.9, 54.1, 67.0, 69.8, 70.0, 71.0, 83.0, 87.8, 126.0, 127.9, 129.4, 139.0; IR (film) 3091, 3056, 2959, 2925, 2777, 1730, 1601, 1506, 1459, 1343, 1317, 1260, 1105, 1033, 1000, 933, 877, 808, 764, 701  $\text{cm}^{-1}$ ; HRMS (ESI) exact mass calcd for  $(\text{C}_{21}\text{H}_{23}\text{NFe})$  requires  $m/z$  343.1221, found  $m/z$  343.1216. The enantiomeric excess was determined by phenomenex cellulose-1 (25 cm),  $\text{CH}_3\text{CN}$  / IPA = 95 / 5, 0.5mL/min,  $\lambda$  = 214 nm,  $t$  (major) = 10.123 min,  $t$  (minor) = 10.700 min.

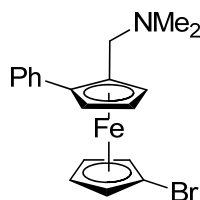

**( $S_p$ )-1-Dimethylaminomethyl-2-phenyl -1'-bromo ferrocene (**3n**)**

Yellow oil (54.9 mg, 69% yield, 97% *ee*). Analytical data for **3n**:  $[\alpha]_D^{20} = +173.6^\circ$  ( $c$  = 0.25 Acetone, 97% *ee*).  $^1\text{H}$  NMR (400 MHz,  $\text{CDCl}_3$ )  $\delta$  2.17 (s, 6H), 3.18 (AB,  $J_{AB}$  = 12.8 Hz, 1H), 3.60 (BA,  $J_{BA}$  = 12.8 Hz, 1H), 3.95-3.98 (m, 2H), 4.20-4.21 (m, 1H),

4.26-4.27 (m, 1H), 4.31-4.32 (m, 2H), 4.48-4.49 (m, 1H), 7.24-7.35 (m, 3H), 7.72-7.74 (m, 2H);  $^{13}\text{C}$  NMR (100 MHz,  $\text{CDCl}_3$ )  $\delta$  45.0, 56.9, 69.3, 69.7, 70.0, 71.6, 72.2, 72.3, 74.5, 78.4, 83.4, 89.4, 126.3, 128.0, 129.4, 137.8; IR (film) 3084, 3056, 2938, 2812, 2763, 2322, 1727, 1601, 1506, 1456, 1409, 1351, 1258, 1174, 1151, 1017, 871, 804, 764, 700  $\text{cm}^{-1}$ ; HRMS (ESI) exact mass calcd for  $(\text{C}_{19}\text{H}_{20}\text{NBrFe})$  requires  $m/z$  395.0170, found  $m/z$  395.0158. The enantiomeric excess was determined by Daicel Chiralcel OD-H (25 cm), Hexanes / IPA = 98 / 2, 0.3 mL/min,  $\lambda$  = 210 nm,  $t$  (minor) = 17.10 min,  $t$  (major) = 19.41 min.

### Determination of the absolute configuration of product 3a

#### Synthesis of 1-Methyl-2-phenyl-ferrocene ( $S_p$ )-**8**

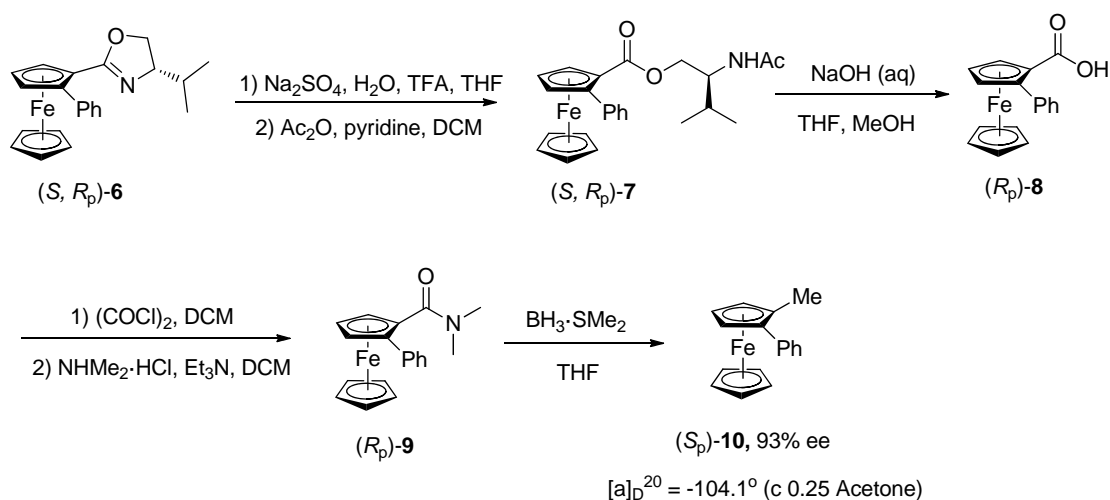

A solution of  $(S, R_p)\text{-6}^{[4]}$  (424.0 mg, 1.14 mmol) in freshly distilled THF (100 mL) was successively treated with water (1.1 mL) and sodium sulfate (8.3 g, 58.4 mmol). Then the mixture was cooled to 0 °C before trifluoroacetic acid (0.5 mL) was added *via* a syringe. The reaction mixture was stirred for 60 h at room temperature, and then sodium sulfate (2.4 g, 16.9 mmol) was added before the reaction mixture was filtered. The organic solvent was removed under reduced pressure to leave a dark oil, which was immediately dissolved in freshly distilled 30 mL dichloromethane. The resulting solution was cooled to 0 °C, and acetic anhydride (4 mL, 42.3 mmol) was added followed by pyridine (6.3 mL, 80.2 mmol). The mixture was stirred overnight at room temperature. Then the resulting dark solution was quenched with 3 N HCl, washed

with saturated sodium bicarbonate solution, dried over anhydrous  $\text{MgSO}_4$  and filtrated. After the solvent was removed under reduced pressure, the residue amide (S,  $R_p$ )-**7** was obtained and used directly in the next step.

To a solution of the above amide (S,  $R_p$ )-**7** (344.5 mg, 0.79 mmol) in THF (5 mL) and  $\text{CH}_3\text{OH}$  (15 mL) was added aqueous NaOH (7.9 mL, 2.5 N). The reaction was refluxed for 2 h, then the mixture was cooled to room temperature and the solvent was removed under reduced pressure. The residue was acidified with hydrochloric acid to pH = 1, then extracted with dichloromethane. The combined organic layers were washed with brine, dried over anhydrous  $\text{Na}_2\text{SO}_4$  and filtrated. After the solvent was removed under reduced pressure, the crude carboxylic acid ( $R_p$ )-**8** was obtained and used directly in the next step.

To a solution of ( $R_p$ )-**8** (246.8 mg, 0.81 mmol) in  $\text{CH}_2\text{Cl}_2$  (20 mL) was added oxalyl chloride (154.2 mg, 1.22 mmol). The reaction was stirred for 4 h at room temperature, and then the solvent was removed under reduced pressure. The residue was dissolved with 20 mL  $\text{CH}_2\text{Cl}_2$ , and triethylamine (163.9 mg, 1.62 mmol) and dimethylamine hydrochloride (66.0 mg, 0.81 mmol) were then added. After the resulting mixture was stirred for 4 h, it was quenched with saturated sodium bicarbonate solution, extracted with  $\text{CH}_2\text{Cl}_2$ , washed with brine, dried over anhydrous  $\text{Na}_2\text{SO}_4$  and filtrated. After the solvent was removed under reduced pressure, the residue was purified by silica gel column chromatography (ethyl acetate/petroleum ether = 1/8) to afford amide ( $R_p$ )-**9** (220.3 mg, 82% yield). Analytical data for ( $R_p$ )-**9**:  $[\alpha]_D^{20} = +51.8$  (c = 0.25 Acetone).  $^1\text{H}$  NMR (300 MHz,  $\text{CDCl}_3$ )  $\delta$  2.41 (s, 3H), 2.95 (s, 3H), 4.24 (s, 5H), 4.32 (t,  $J = 2.1$  Hz, 1H), 4.54 (s, 2H), 7.22-7.31 (m, 3H), 7.49 (d,  $J = 6.9$  Hz, 2H);  $^{13}\text{C}$  NMR (75 MHz,  $\text{CDCl}_3$ )  $\delta$  35.2, 38.1, 65.8, 67.4, 70.7, 71.3, 85.0, 85.6, 126.4, 127.5, 128.2, 138.1, 169.6; IR (film) 2963, 1634, 1412, 1260, 1090, 1019, 866, 798  $\text{cm}^{-1}$ ; HRMS (ESI) exact mass calcd for ( $\text{C}_{20}\text{H}_{23}\text{NFe}$ ) requires  $m/z$  331.0857, found  $m/z$  331.0863.

Under argon, to a solution of amide ( $R_p$ )-**9** (220.3 mg, 0.66 mmol) in THF (4 mL) was added  $\text{BH}_3 \cdot \text{Me}_2\text{S}$  (150.4 mg, 1.98 mmol, 3 equiv). After the reaction was refluxed for 4 h, the mixture was quenched with water, extracted with

dichloromethane. The combined organic layers were washed with brine, dried over anhydrous  $\text{Na}_2\text{SO}_4$  and filtrated. After the solvent was removed under reduced pressure, the residue was purified by silica gel column chromatography (ethyl acetate/petroleum ether = 1/50) to give (*S<sub>p</sub>*)-**10** (36.5 mg, 20% yield). Analytical data for (*S<sub>p</sub>*)-**10**:  $[\alpha]_{\text{D}}^{20} = -104.1$  ( $c = 0.25$  Acetone, 93% *ee*);  $^1\text{H}$  NMR (300 MHz,  $\text{CDCl}_3$ )  $\delta$  2.81 (s, 3H), 4.03 (s, 5H), 4.13 (s, 1H), 4.20 (s, 1H), 4.38 (s, 1H), 7.23-7.34 (m, 3H), 7.53-7.56 (m, 2H);  $^{13}\text{C}$  NMR (75 MHz,  $\text{CDCl}_3$ )  $\delta$  14.8, 66.1, 69.0, 70.1, 70.5, 81.8, 86.7, 125.9, 127.8, 128.8, 139.0; IR (film) 3087, 3057, 2920, 1946, 1740, 1600, 1504, 1438, 1376, 1265, 1103, 1031, 999, 808, 761, 696, 660, 638  $\text{cm}^{-1}$ ; HRMS (ESI) exact mass calcd for ( $\text{C}_{17}\text{H}_{16}\text{Fe}$ ) requires  $m/z$  274.0643, found  $m/z$  274.0635. The enantiomeric excess was determined by Diacel Chiralcel OD-H (25 cm), Hexanes / IPA = 29 / 1, 0.3 mL/min,  $\lambda = 254$  nm,  $t$  (minor) = 17.32 min,  $t$  (major) = 18.72 min.

#### Synthesis of 1-methyl-2-phenyl-ferrocene (*R<sub>p</sub>*)-**10**

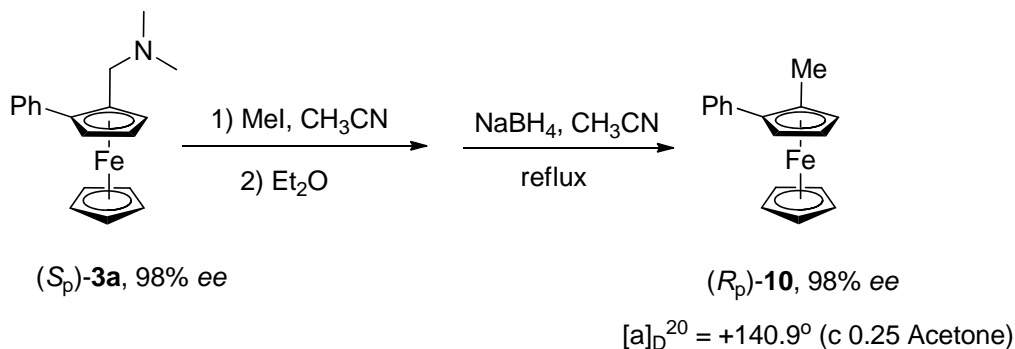

To a solution of product **3a** (220.3 mg, 0.69 mmol) in acetonitrile (20 mL) was added  $\text{CH}_3\text{I}$  (293.8 mg, 2.07 mmol). After the reaction was stirred for 1 h at room temperature, diethyl ether was added and the reaction mixture was filtrated. The solid was washed with diethyl ether three times. The combined organic filtrate was concentrated under reduced pressure. The solid was dissolved in acetonitrile,  $\text{NaBH}_4$  (52.2 mg, 1.38 mmol) was added in portions. After the reaction was refluxed for 4 h, the reaction mixture was cooled to room temperature, quenched with  $\text{H}_2\text{O}$  and extracted with ethyl acetate. The combined organic layers were washed with brine, dried over anhydrous  $\text{Na}_2\text{SO}_4$  and filtrated. After the solvent was removed under reduced pressure, the residue was purified by silica gel column chromatography (ethyl

acetate/petroleum ether = 1/10) to give (*R<sub>p</sub>*)-**10** (142.9 mg, 75% yield). Analytical data for (*R<sub>p</sub>*)-**10**:  $[\alpha]_D^{20} = +140.9$  (*c* = 0.25 Acetone, 98% *ee*); The enantiomeric excess was determined by Diacel Chiralcel OD-H (25 cm), Hexanes / IPA = 29 / 1, 0.3 mL/min,  $\lambda$  = 254 nm, *t* (major) = 17.20 min, *t* (minor) = 18.68 min.

### Synthesis of **L1** and Pd-catalyzed asymmetric allylic alkylation

Synthesis of 1-dimethylaminomethyl-2-phenyl -1'-diphenylphosphine ferrocene (**L1**)

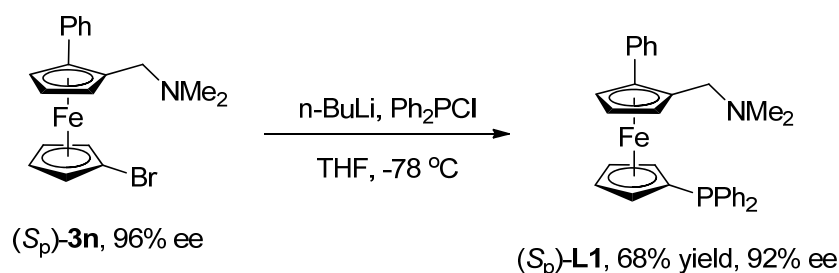

To a solution of compound (*S<sub>p</sub>*)-**3n** (473 mg, 1.1 mmol) in THF (8.8 mL) was added *n*-BuLi (0.55 mL, 1.3 mmol, 2.4 M in *n*-hexane) at -78°C under argon. The resulting deep red solution was stirred for 30 min. Then chlorodiphenylphosphine (0.29 mL, 1.5 mmol) was added. The mixture was warmed slowly to 0°C and stirred for 1 h. Then the reaction mixture was quenched with water, extracted with ether. The combined organic layers were washed with brine, dried over Na<sub>2</sub>SO<sub>4</sub>, and filtrated. After the solvent was removed under reduced pressure, the residue was purified by column chromatography (ethyl acetate/petroleum = 1/15 v/v, 2% Et<sub>3</sub>N) to give (*S<sub>p</sub>*)-**L1** (406 mg, 68% yield, 92% *ee*) as an orange solid. Analytical data for (*S<sub>p</sub>*)-**L1**:  $[\alpha]_D^{20} = +24.8^\circ$  (*c* = 0.25 Acetone, 92% *ee*). <sup>1</sup>H NMR (400 MHz, CDCl<sub>3</sub>)  $\delta$  2.13 (s, 6H), 2.88 (AB, *J<sub>AB</sub>* = 12.8 Hz, 1H), 3.52 (AB, *J<sub>BA</sub>* = 12.8 Hz, 1H), 4.05 (s, 2H), 4.11-4.13 (m, 2H), 4.20 (s, 1H), 4.24 (s, 1H), 4.41 (s, 1H), 7.19-7.41 (m, 13H), 7.63-7.65 (m, 2H); <sup>31</sup>P NMR (CDCl<sub>3</sub> 161 MHz)  $\delta$  -16.91; IR (film) 3055, 2930, 2819, 2772, 2361, 1598, 1504, 1455, 1434, 1303, 1250, 1158, 1091, 1065, 1017, 970, 921, 886, 825, 765, 744 cm<sup>-1</sup>; HRMS (ESI) exact mass calcd for (C<sub>31</sub>H<sub>30</sub>NPFe) requires *m/z* 501.1507, found *m/z* 501.1523. The enantiomeric excess was determined by Diacel Chiralcel OD-H (25 cm), Hexanes / IPA = 98 / 2, 0.3 mL/min,  $\lambda$  = 210 nm, *t* (minor) = 18.78 min, *t* (major) = 22.80 min.

## Palladium-Catalyzed Allylic Alkylation with (*S<sub>p</sub>*)-**L1**

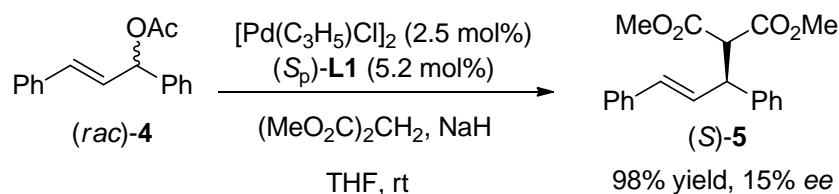

A mixture of ligand (*S<sub>p</sub>*)-**L1** (92% ee, 10.1 mg, 0.02 mmol) and  $[\text{Pd}(\text{C}_3\text{H}_5)\text{Cl}]_2$  (3.7 mg, 0.01 mmol) in dry THF (2 mL) was stirred at room temperature for 0.5 h, and to the resulting yellow solution was added **4** (100.9 mg, 0.4 mmol). After an additional stirring for 10 min, sodium dimethyl malonate [generated in situ by mixture dimethyl malonate (0.08 mL, 0.8 mmol) with sodium hydride (19.2 mg, 0.8 mmol) in 2 mL THF] was added. The reaction was stirred at room temperature. After completion of the reaction (monitored by TLC), the reaction mixture was quenched with  $\text{NH}_4\text{Cl}$  (aq.) and extracted with ether. The combined organic layers were washed with brine, dried over anhydrous  $\text{Na}_2\text{SO}_4$  and filtrated. After the solvent was removed under reduced pressure, the residue was purified by column chromatography (ethyl acetate / petroleum = 10/1) to give **10** (126 mg, 98% yield, 15% ee). Analytical data for (*S*)-**10**<sup>[5]</sup>:  $[\alpha]_{\text{D}}^{20} = -0.51^\circ$  (c = 1.4 Chloroform, 15% ee).  $^1\text{H}$  NMR (400 MHz,  $\text{CDCl}_3$ )  $\delta$  3.51 (s, 3H), 3.70 (s, 3H), 3.96 (d,  $J$  = 11.2 Hz, 1H), 4.27 (dd,  $J$  = 8.8, 10.4 Hz, 1H), 6.33 (dd,  $J$  = 8.8, 15.8 Hz, 1H), 6.48 (d,  $J$  = 16.0 Hz, 1H), 7.17-7.33 (m, 10H); The enantiomeric excess was determined by Diacel Chiralcel OD-H (25 cm), Hexanes / IPA = 90 / 10, 0.7 mL/min,  $\lambda$  = 254 nm,  $t$  (minor) = 8.12 min,  $t$  (major) = 8.71 min. The absolute configuration of the product **10** was assigned as (*S*) by comparing the optical rotation with that reported in the literature.<sup>[6]</sup>

## References

- (1) Khrushcheva, N. S.; Sokolov, V. I. *Russian. Chemical. Bulletin*. **2004**, 53, 830.
- (2) Bhat, A. R.; Bhat, A. I.; Athar, F.; Azam, A. *Helvetica. Chimica. Acta*. **2009**, 92, 1644.
- (3) Michael, W.; Ulrike, N.; Kurt, M. *Tetrahedron: Asymmetry* **1999**, 10, 4369.



- (4) Xia, J.-B.; You, S.-L. *Organometallics* **2007**, 26, 4869.
- (5) Deng, W.-P.; You, S.-L.; Hou, X.-L.; Dai, L.-X.; Yu, Y.-H.; Xia, W.; Sun, J. *J. Am. Chem. Soc.* **2001**, 123, 6508.
- (6) Hayashi, T.; Yamamoto, A.; Hagihara, T.; Ito, Y. *Tetrahedron Lett.* **1986**, 27, 191.

## NMR and HPLC Spectra

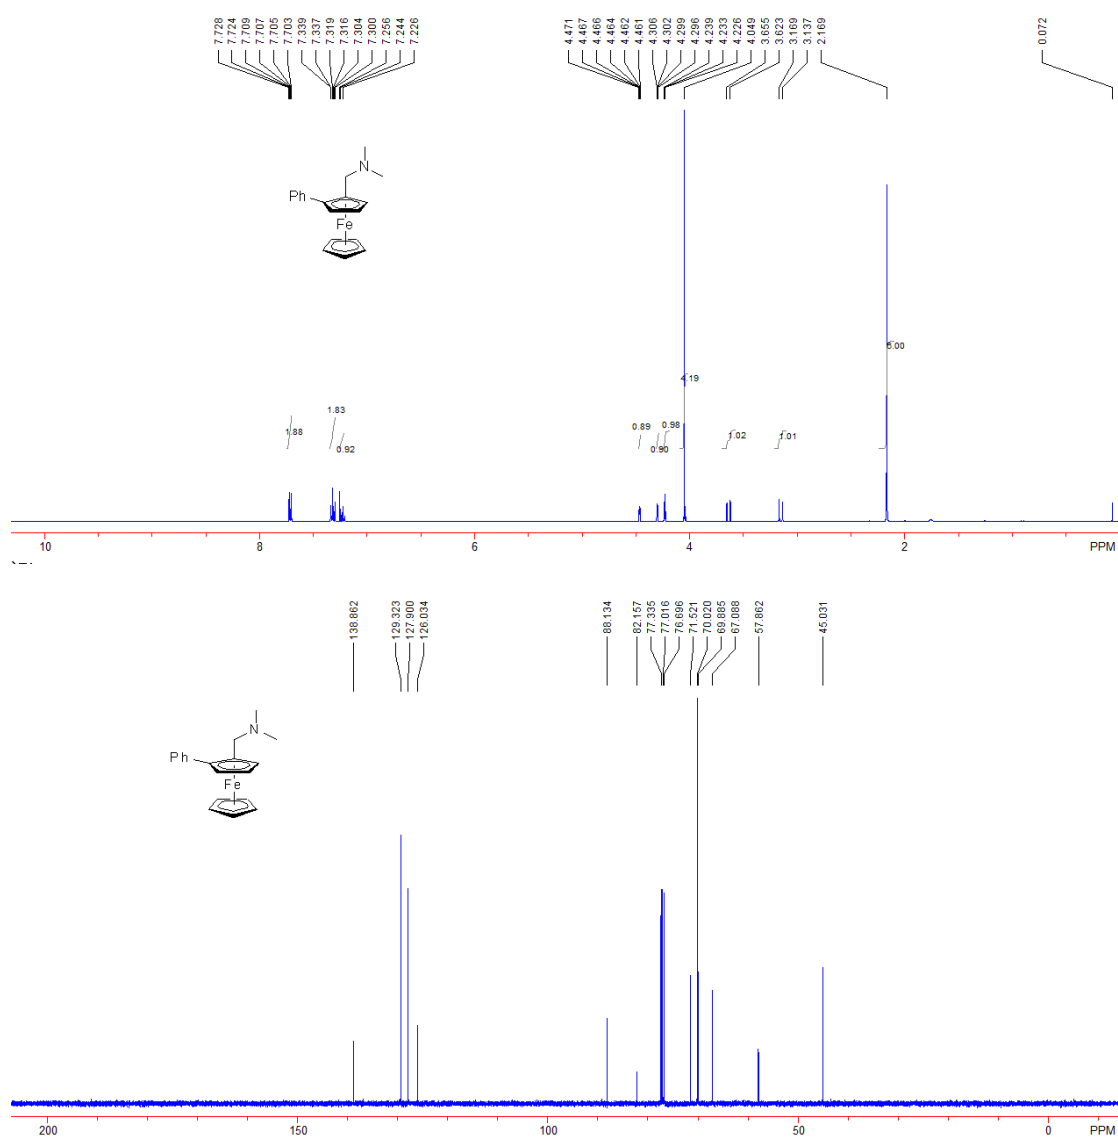

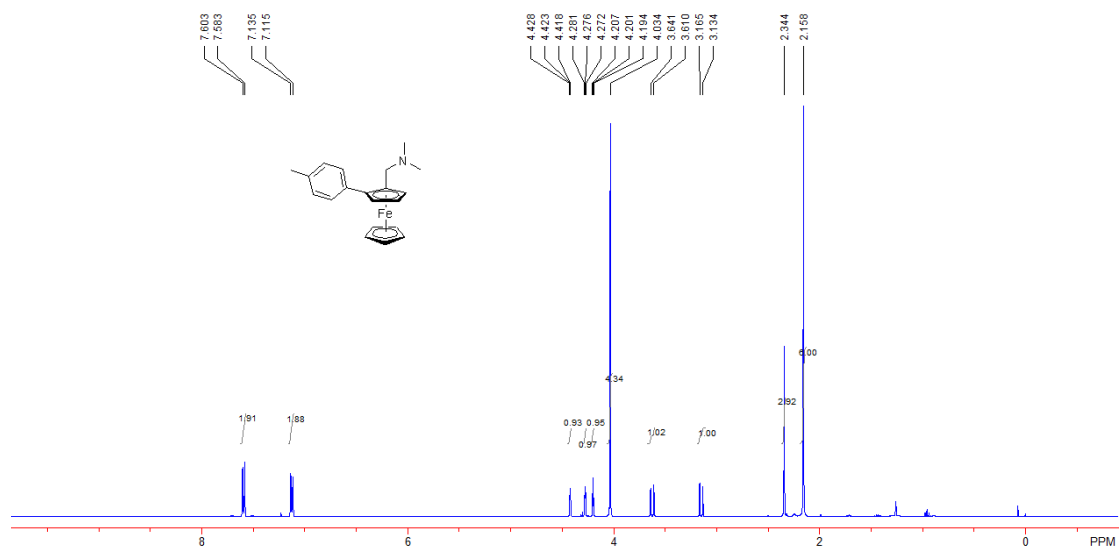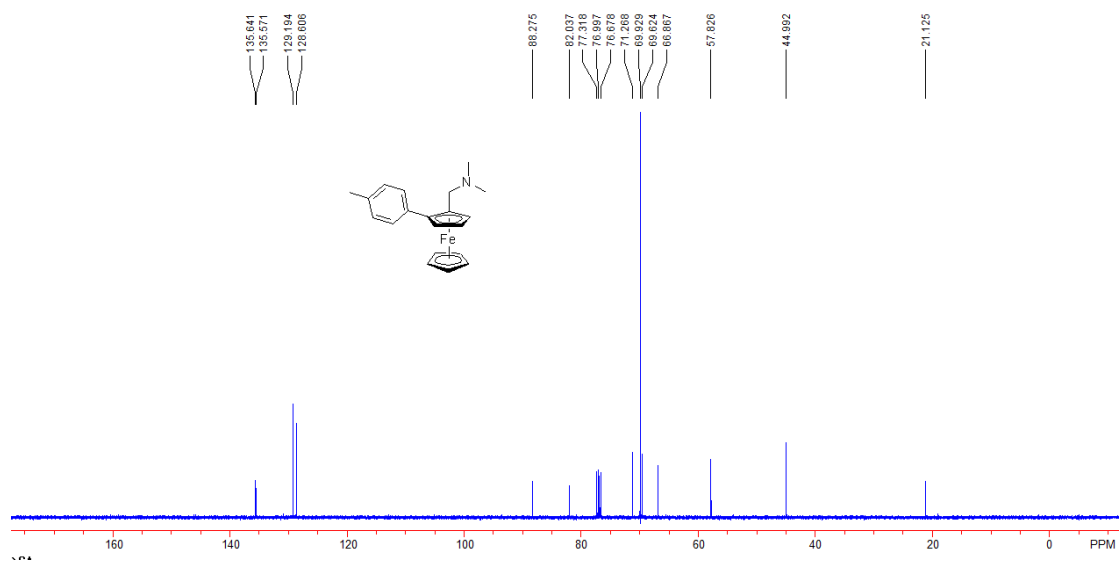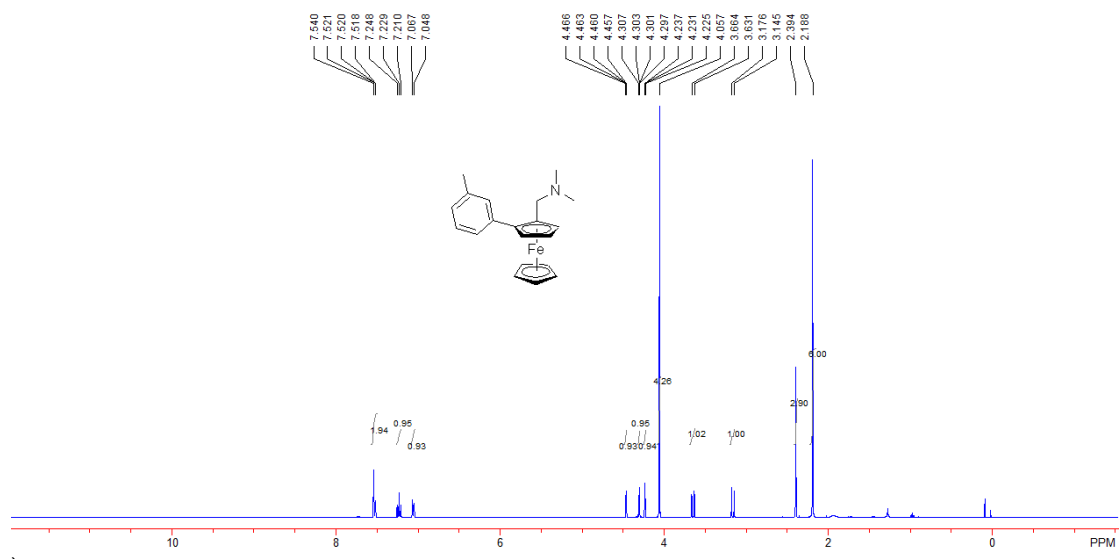

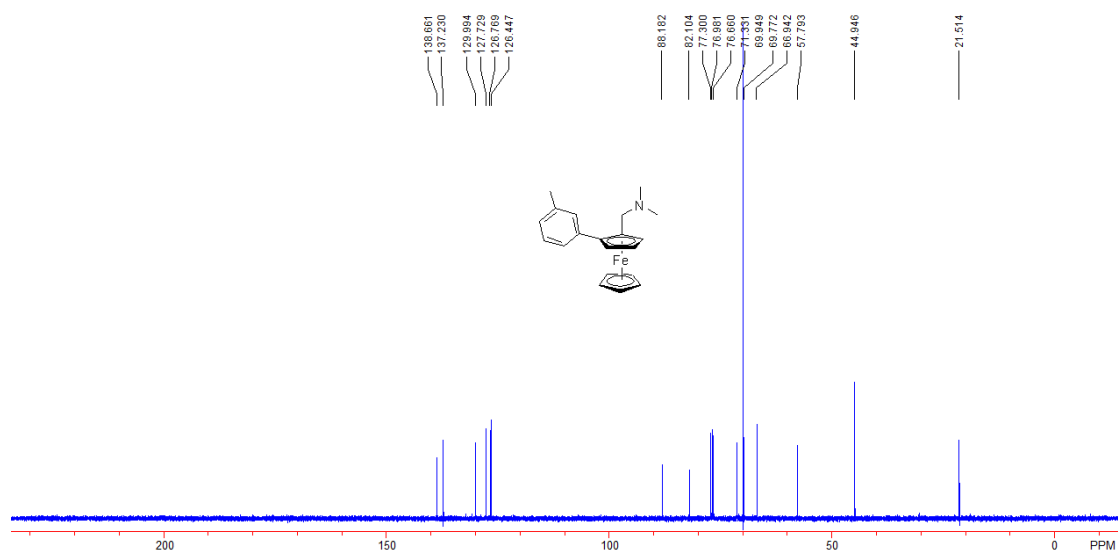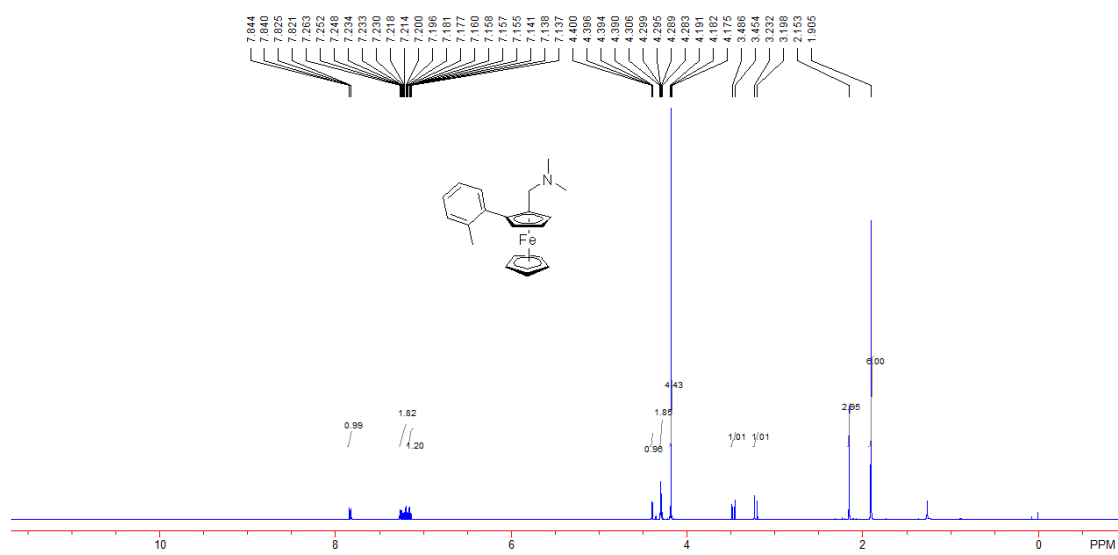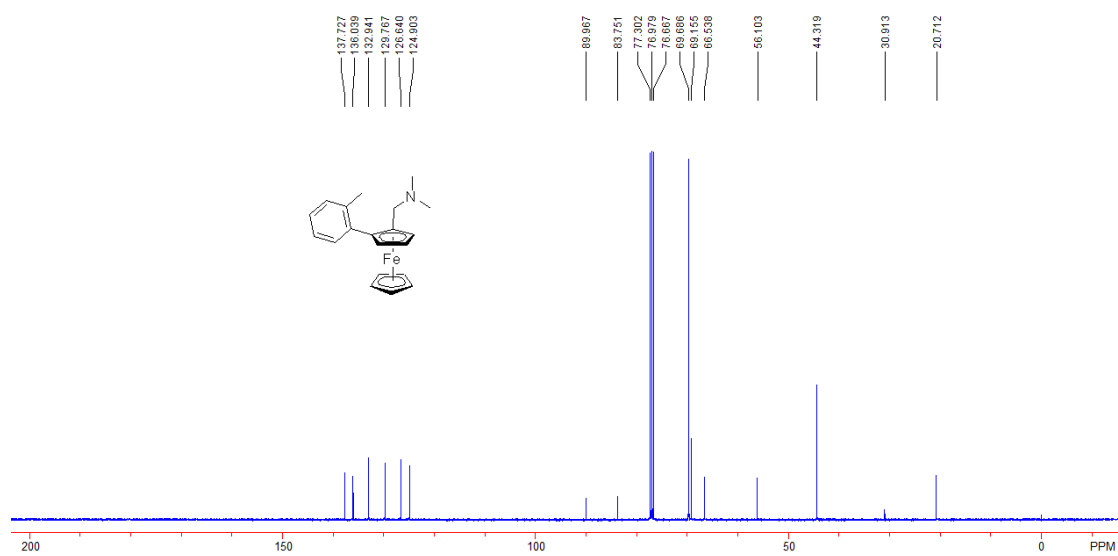

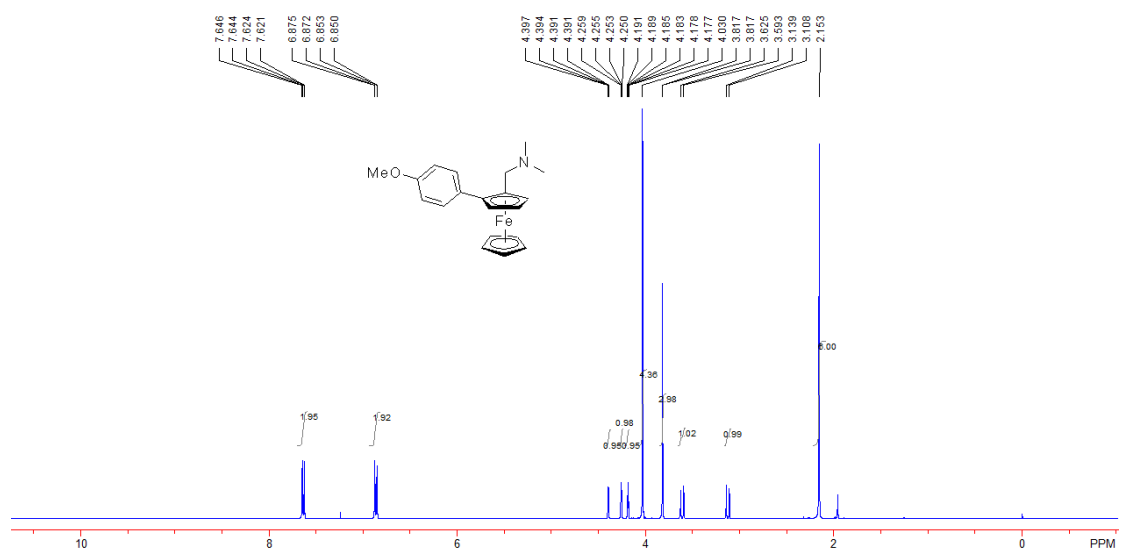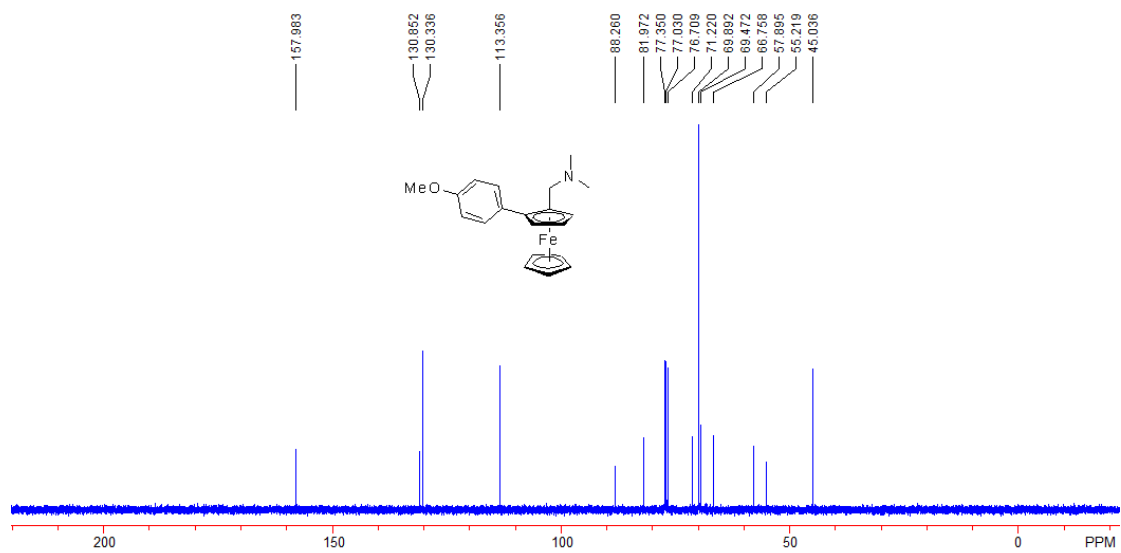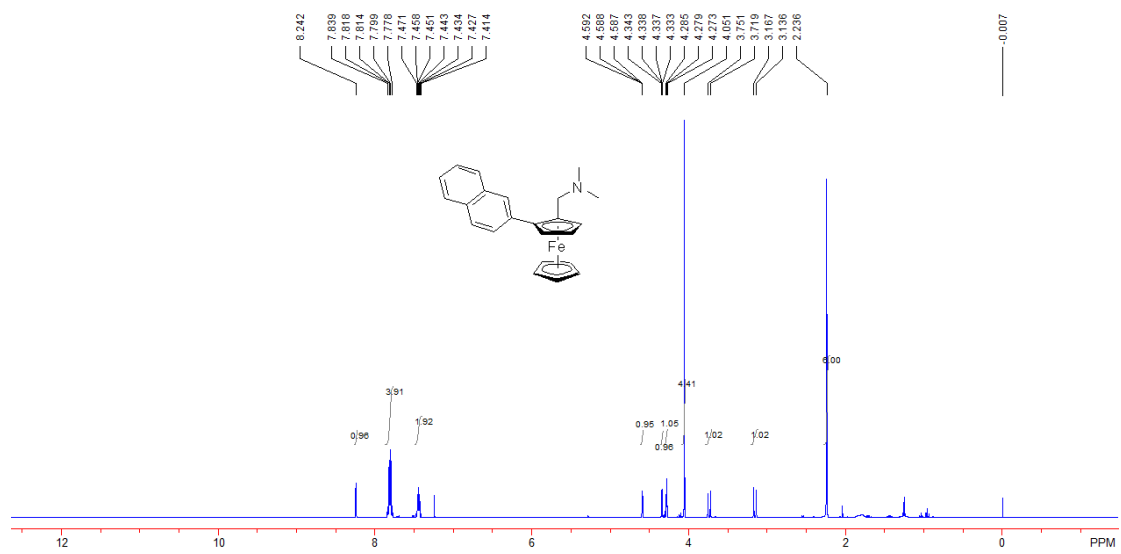

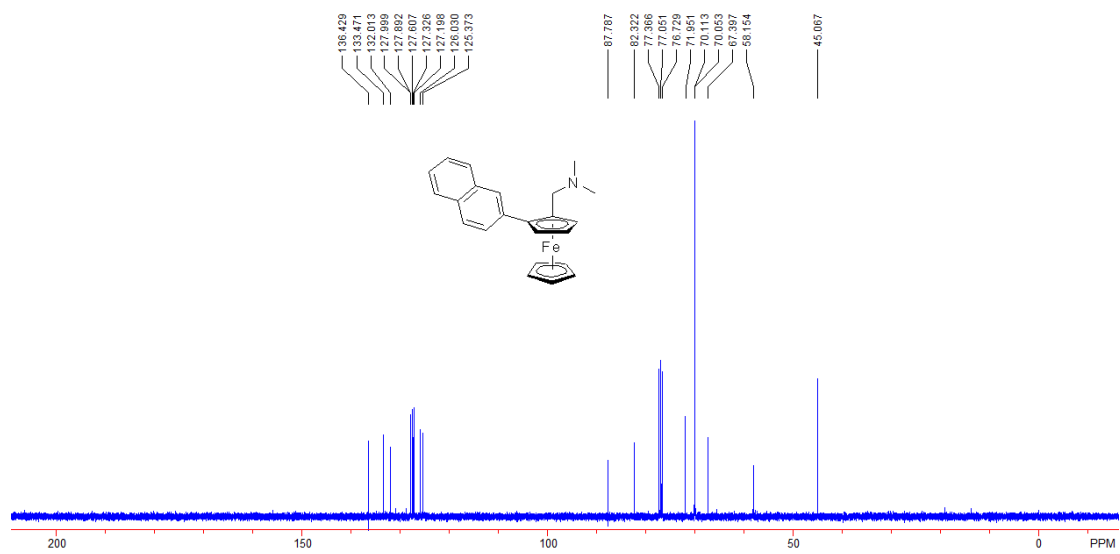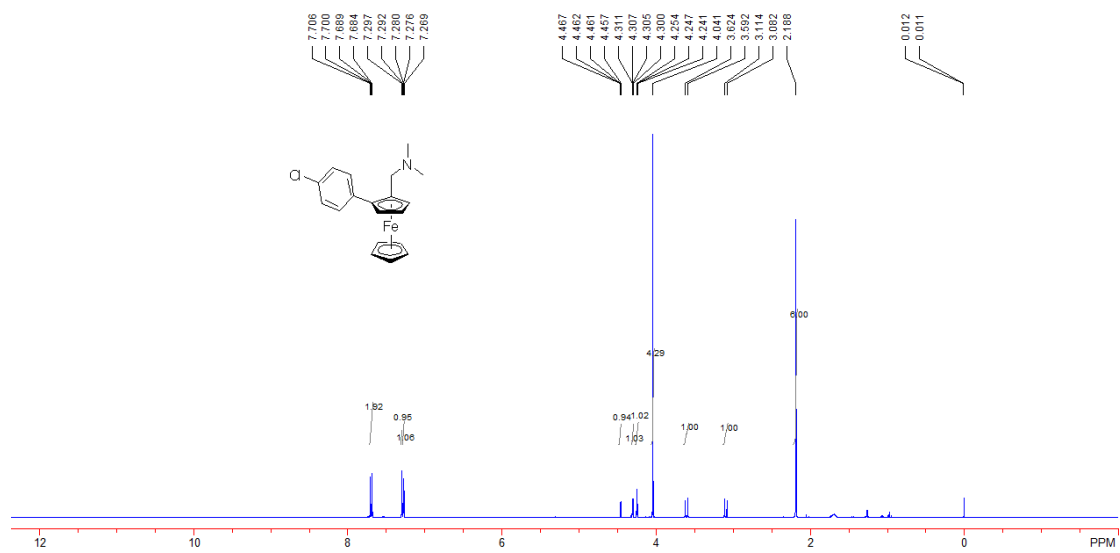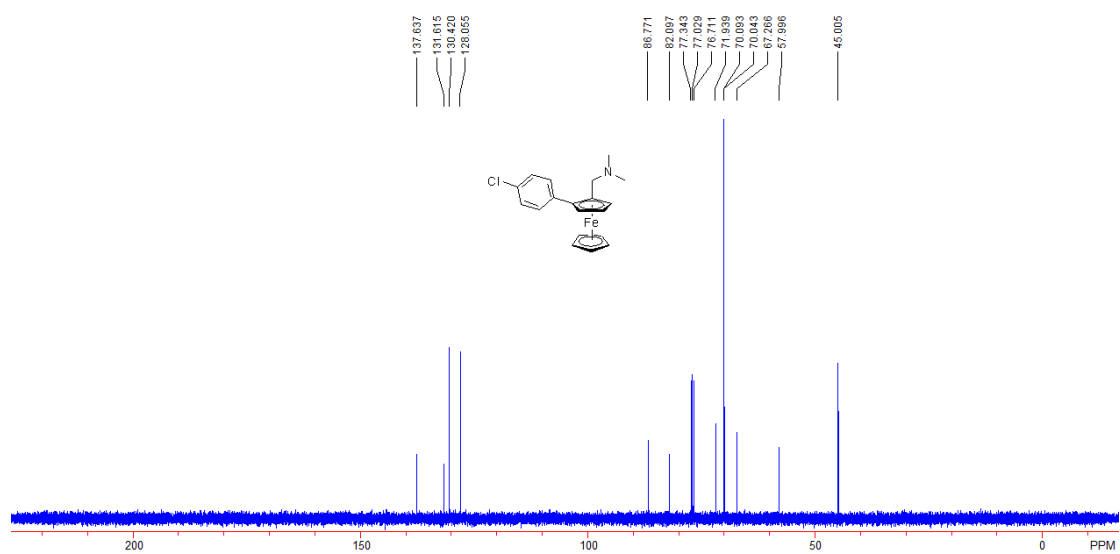

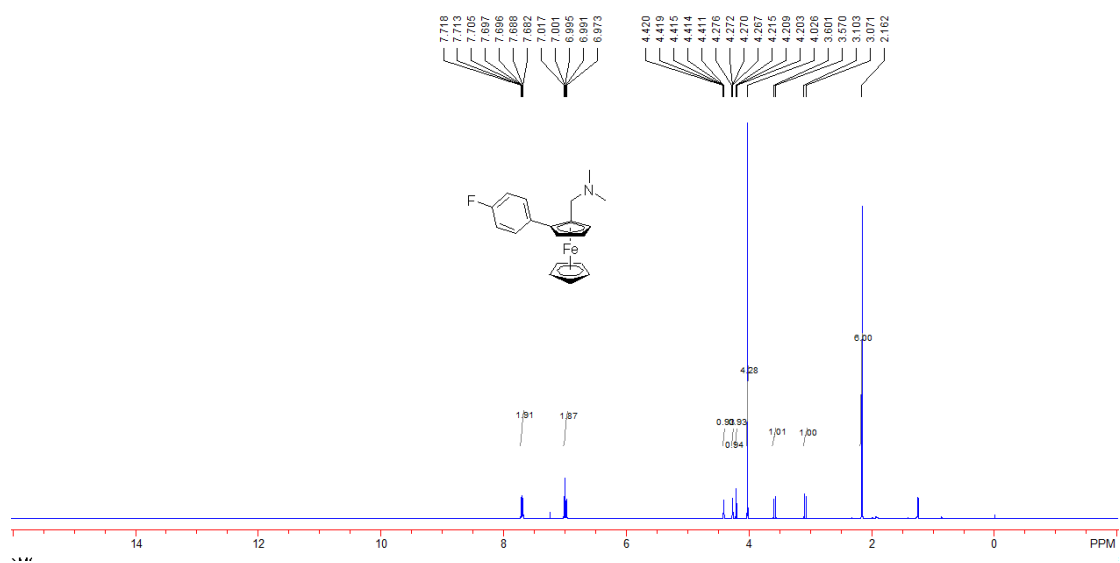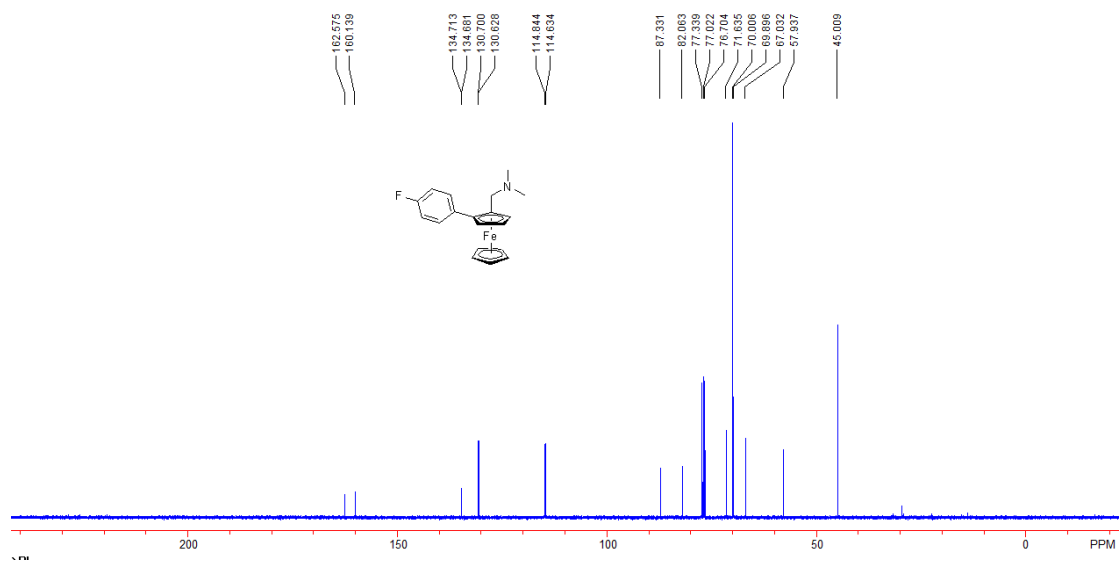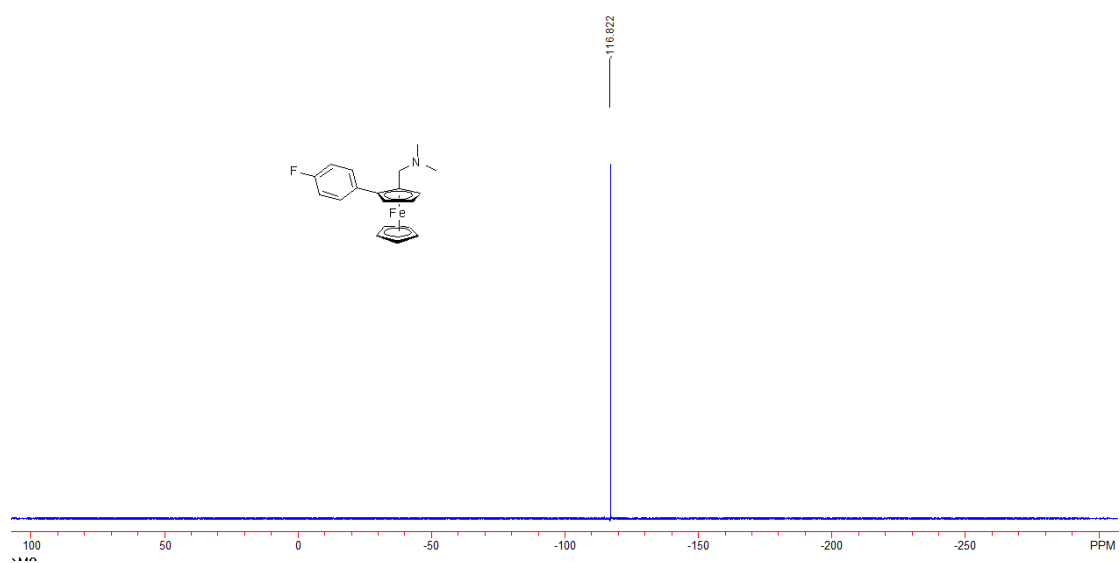

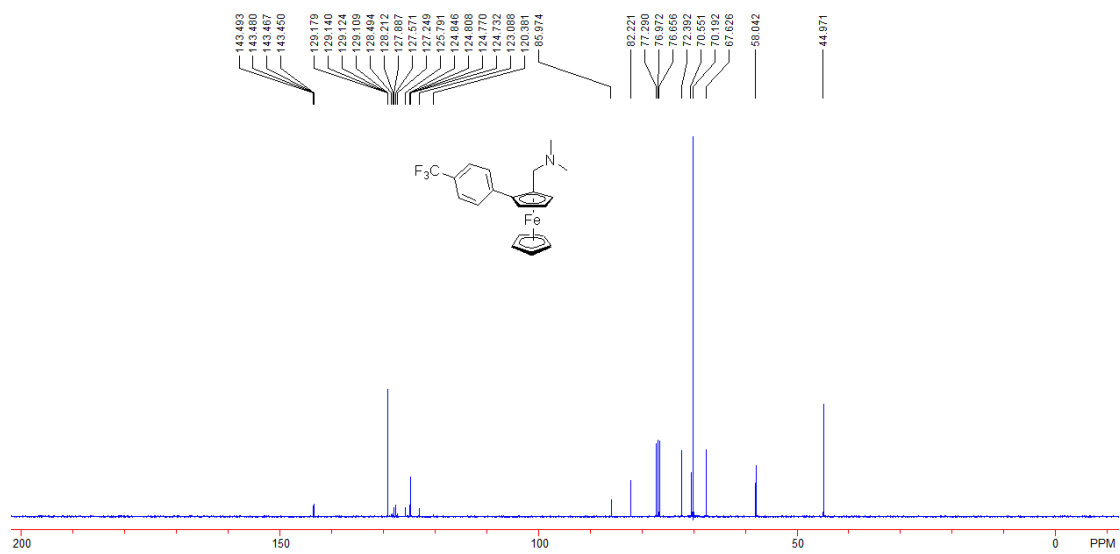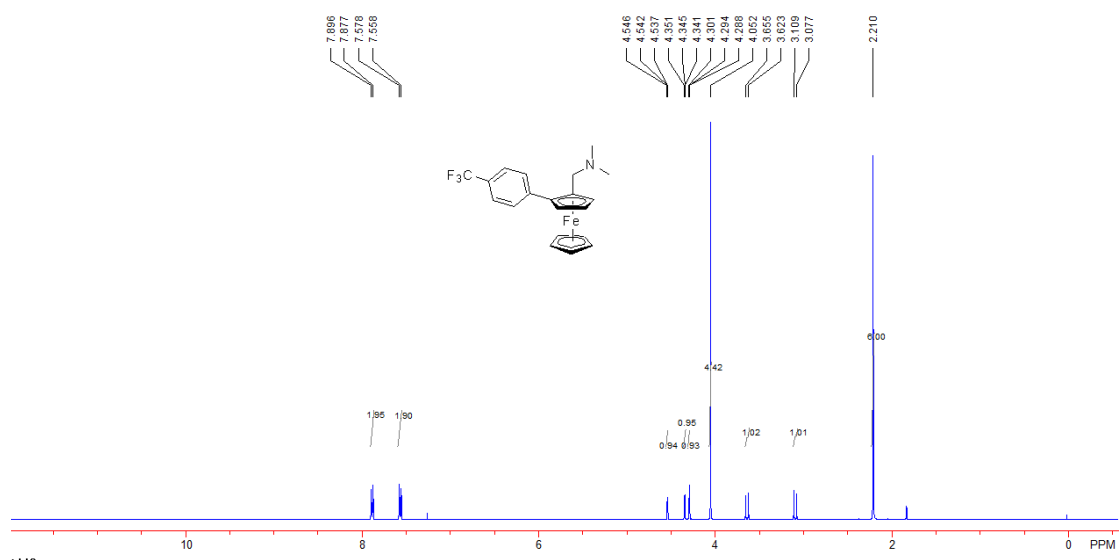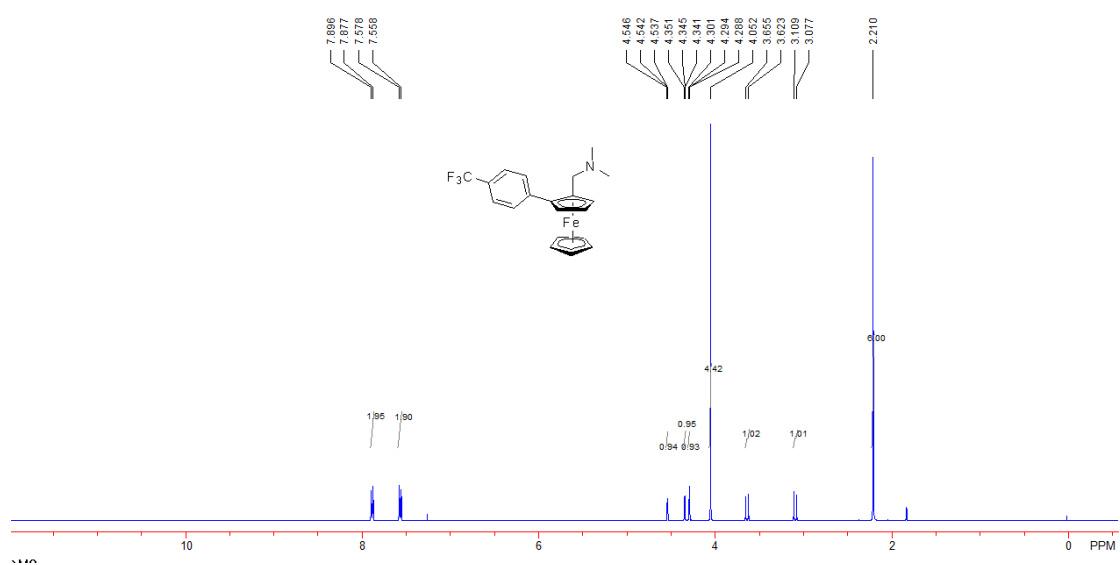

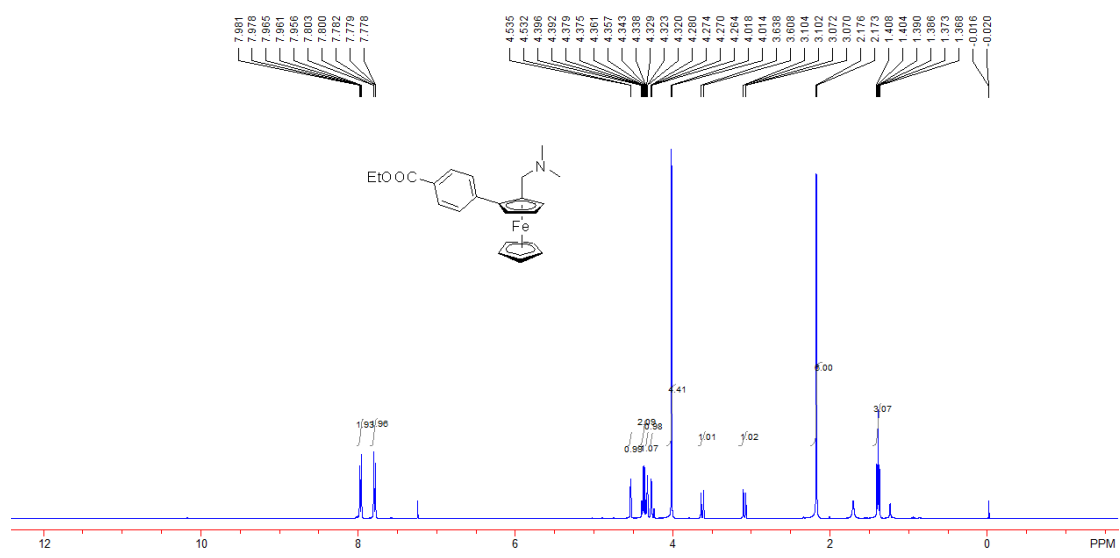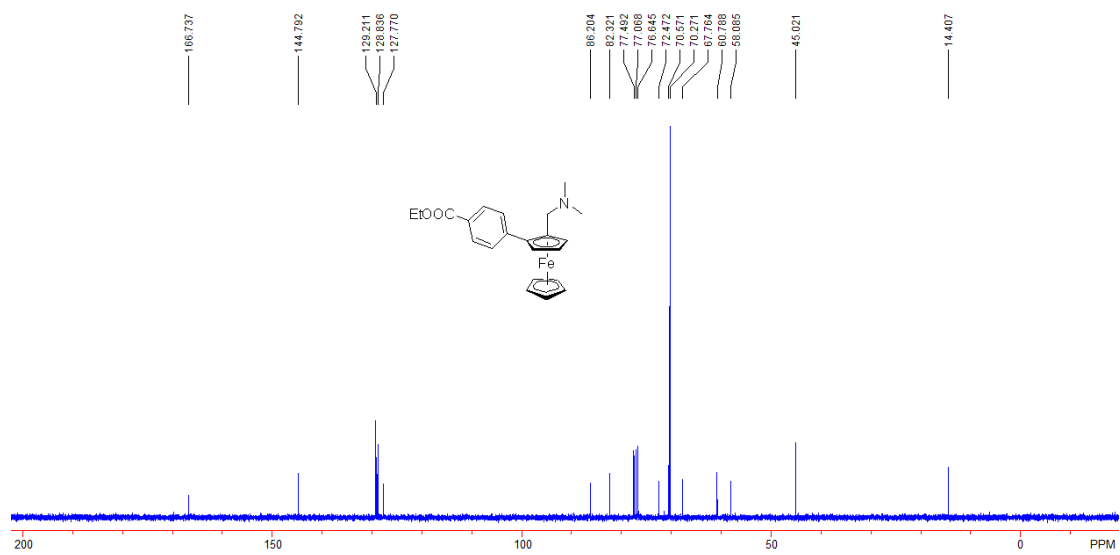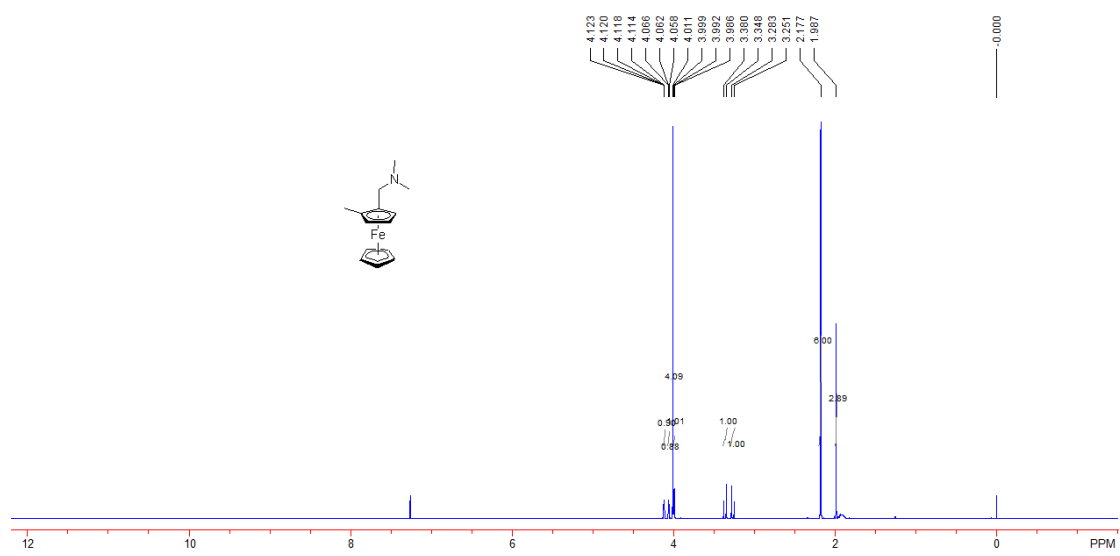



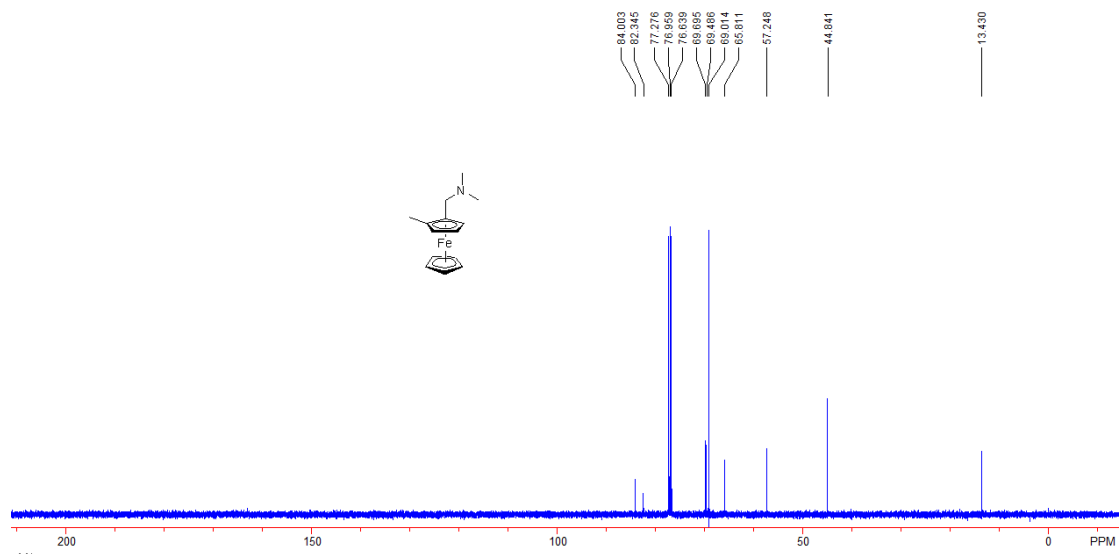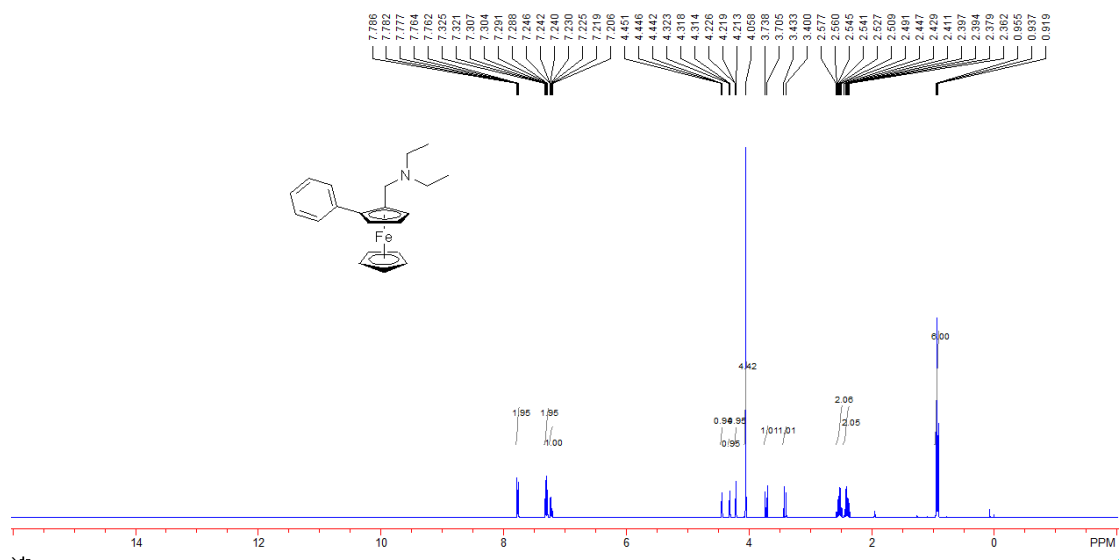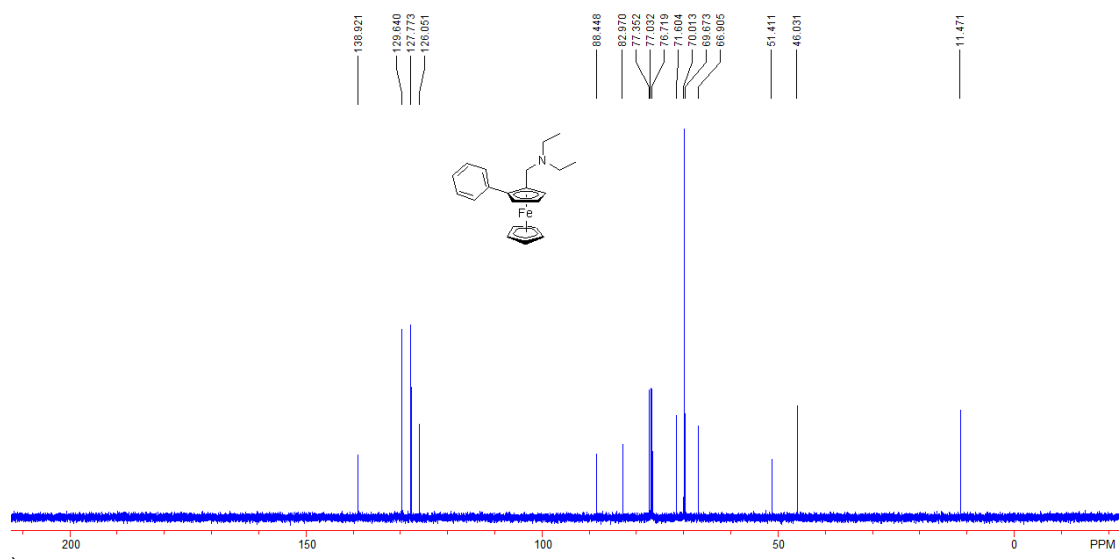

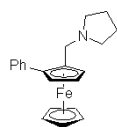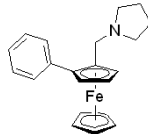

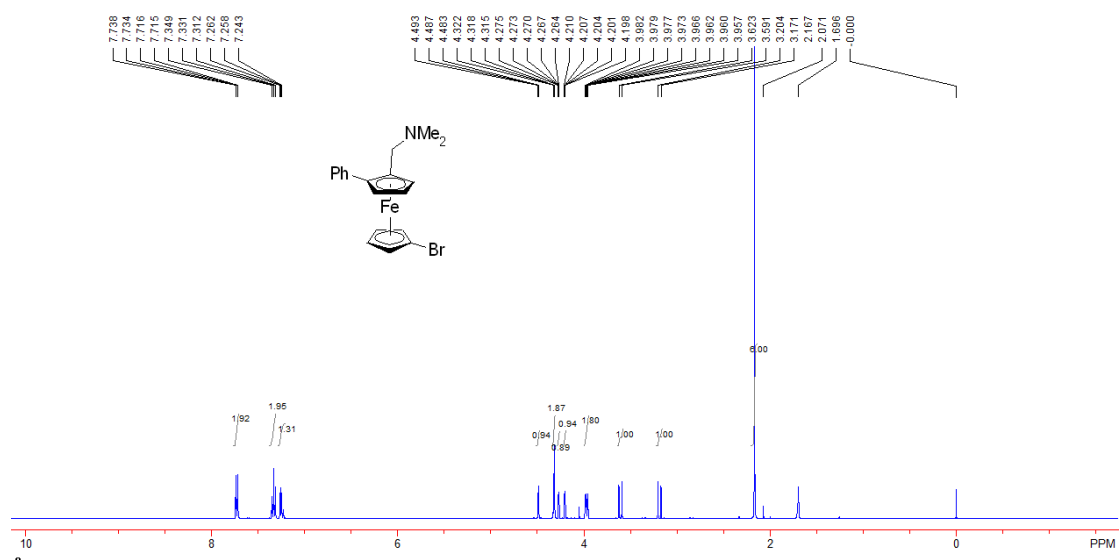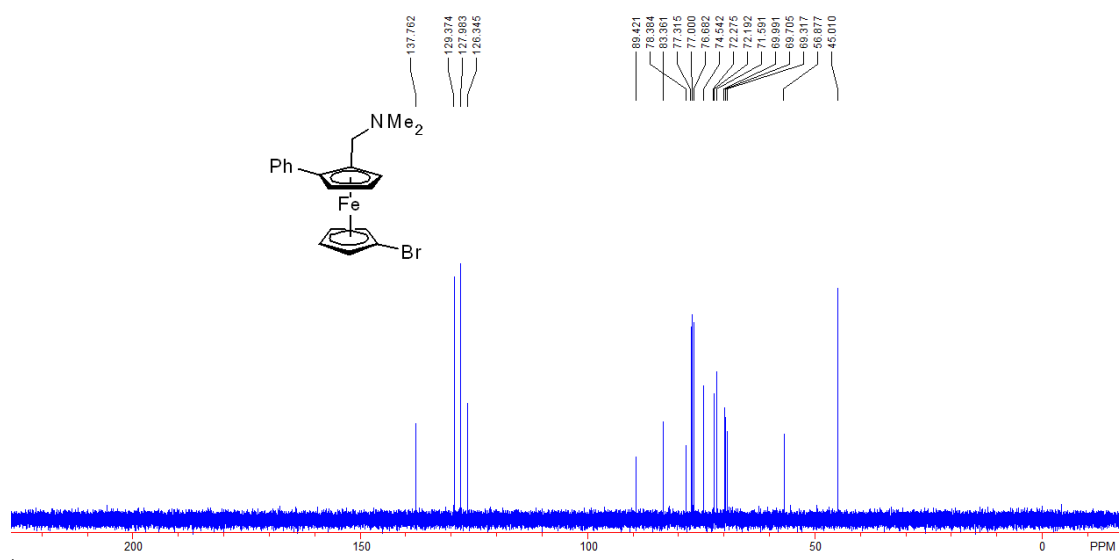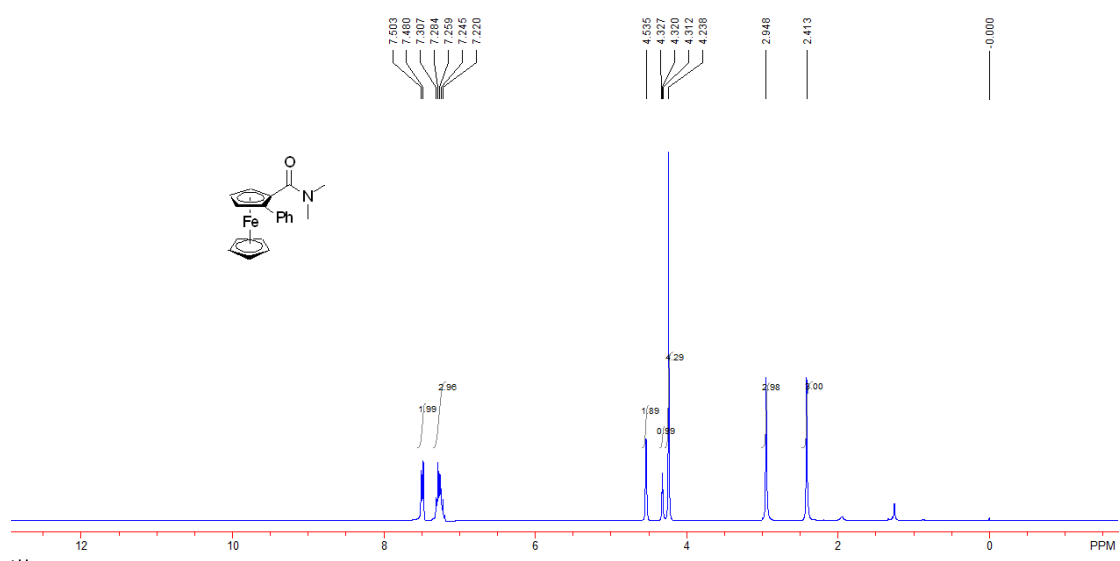

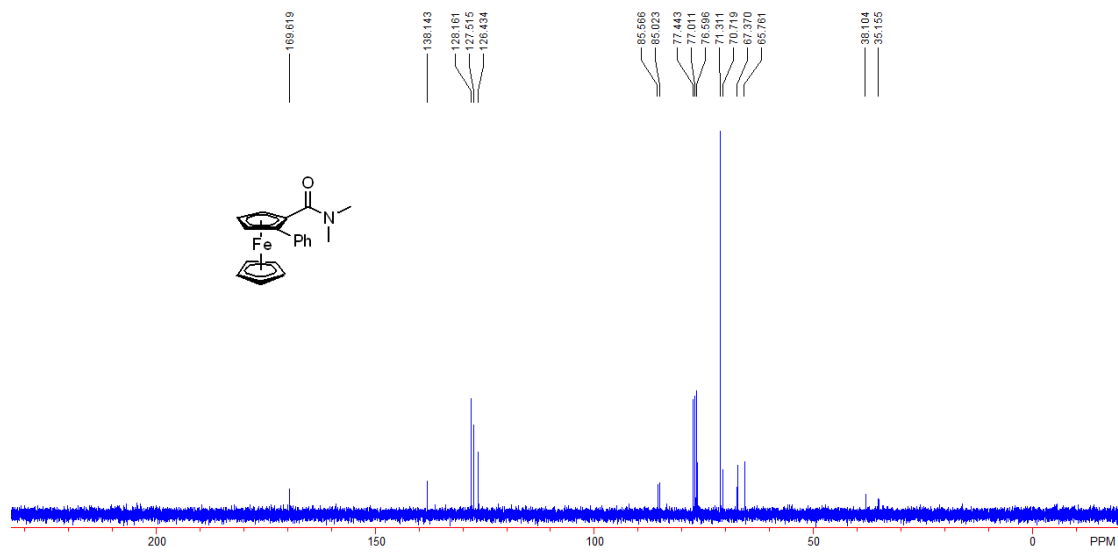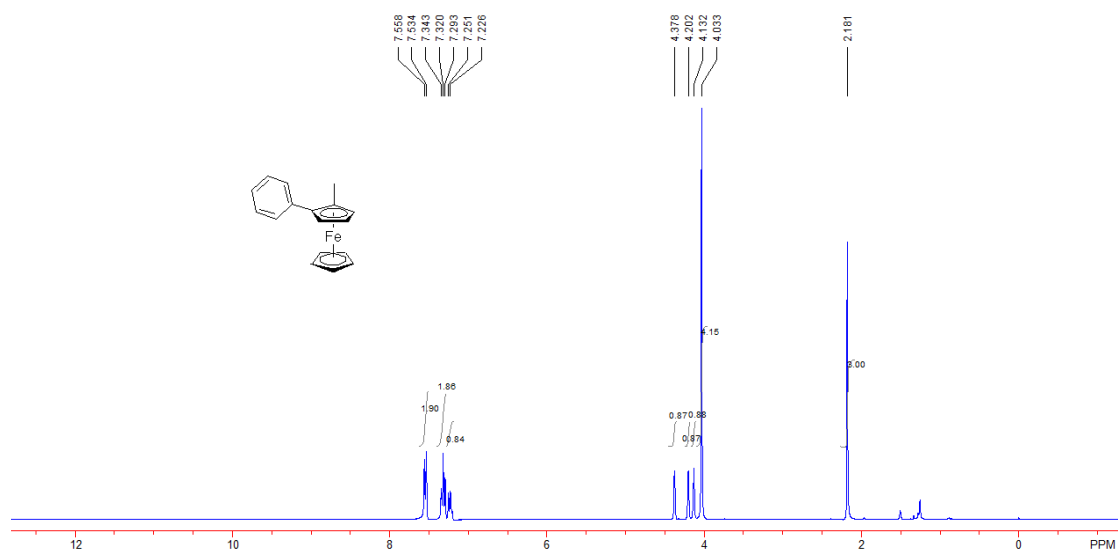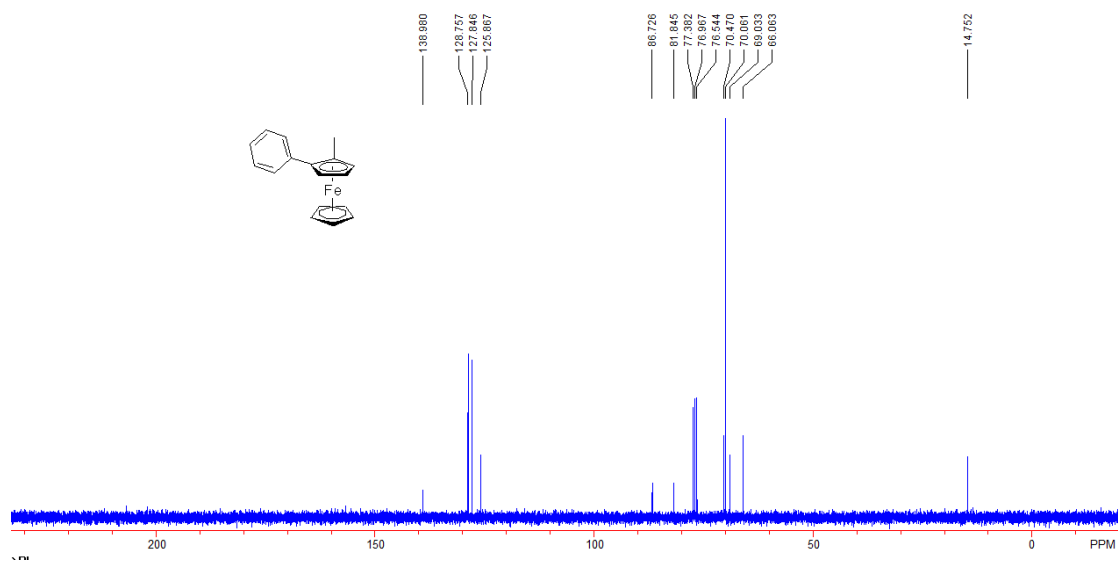

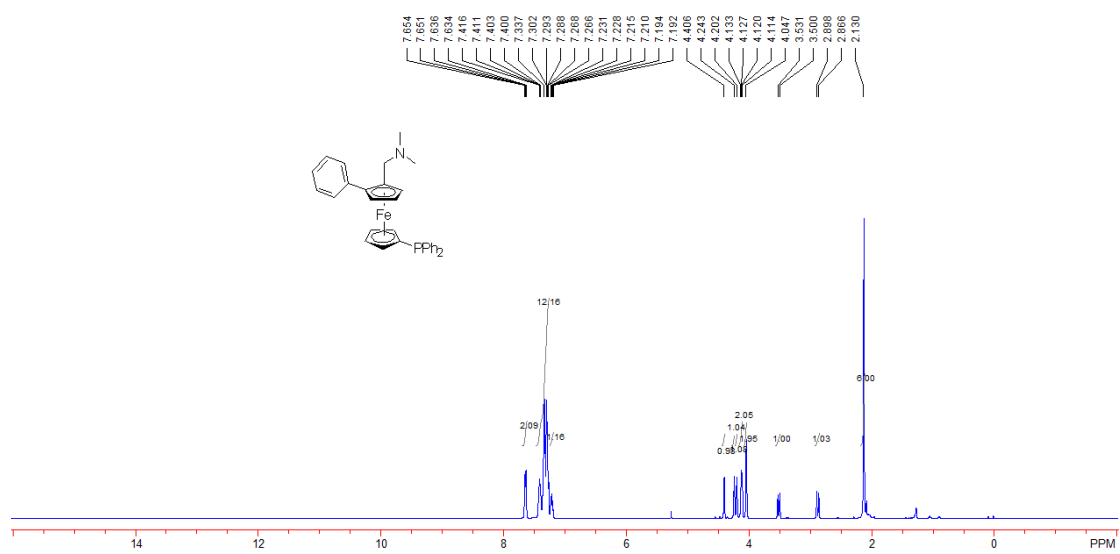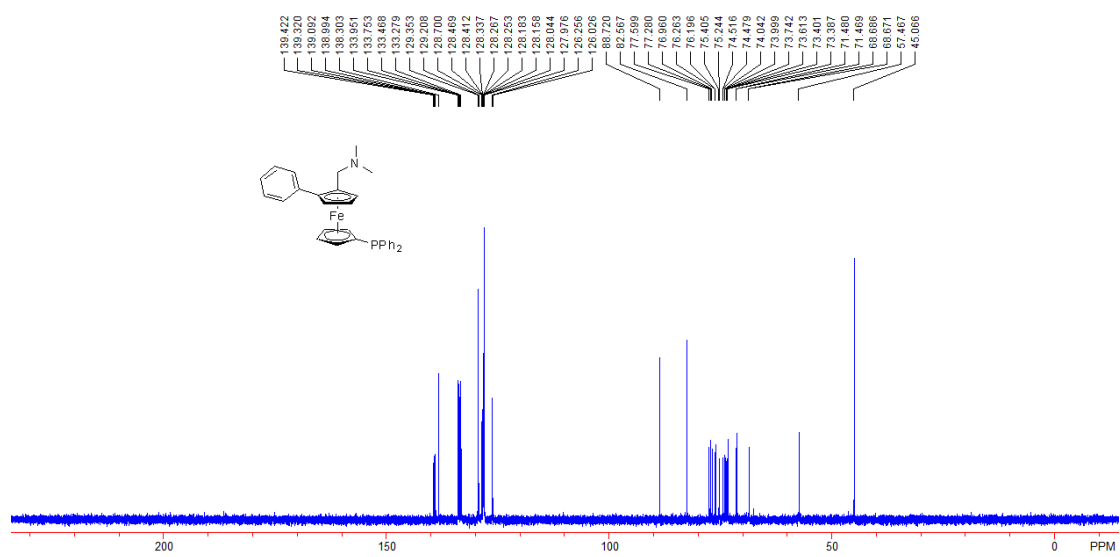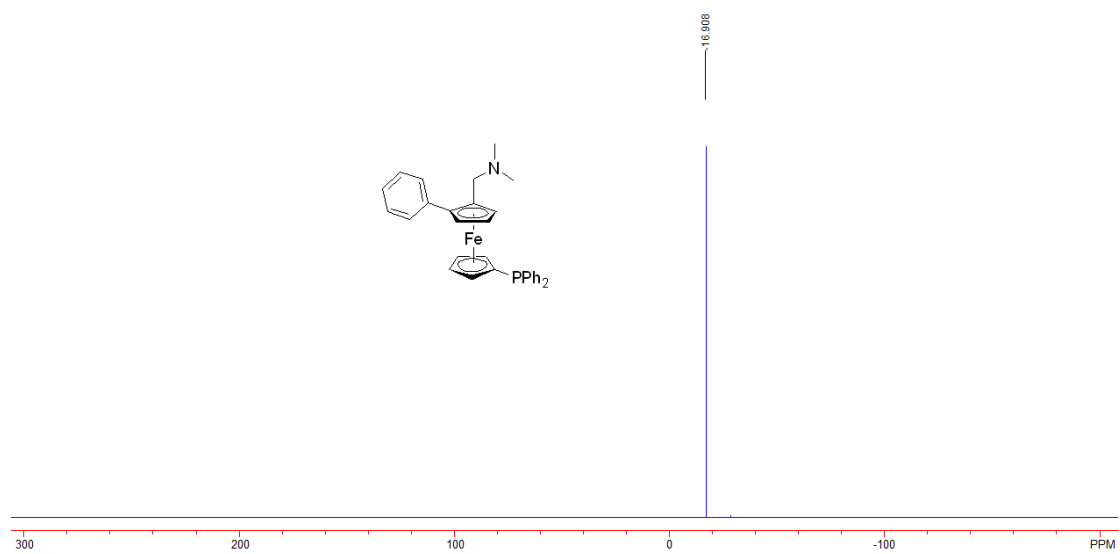

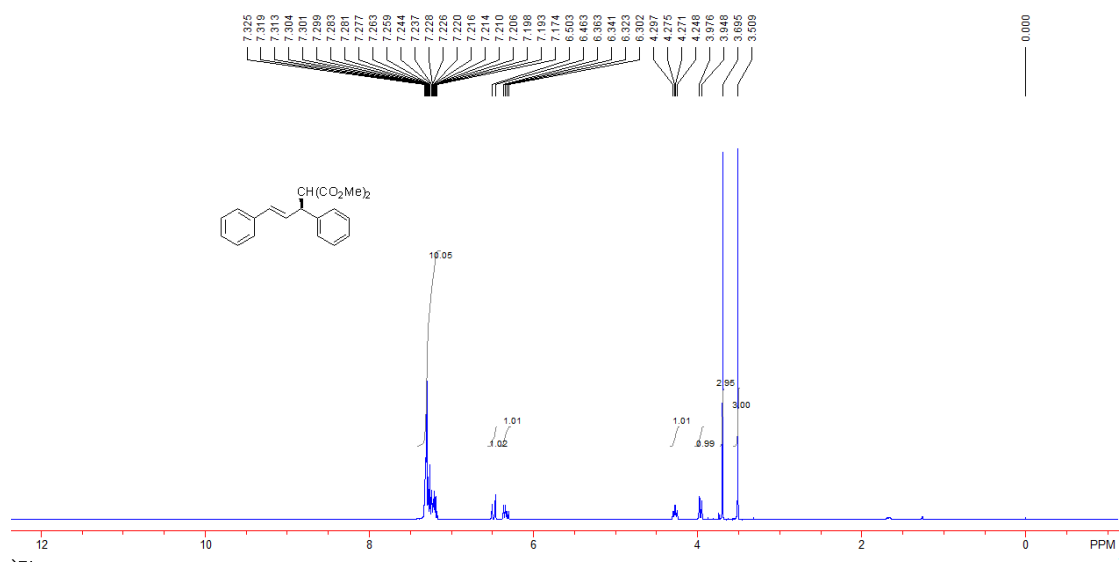

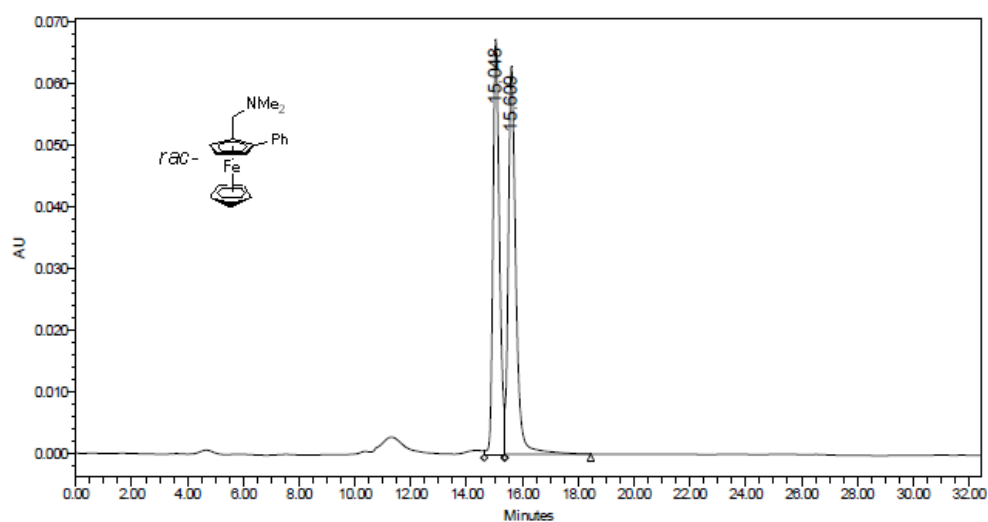

|   | RT<br>(min) | Area<br>( $\mu\text{V}\cdot\text{sec}$ ) | % Area | Height<br>( $\mu\text{V}$ ) | % Height |
|---|-------------|------------------------------------------|--------|-----------------------------|----------|
| 1 | 15.048      | 1082616                                  | 47.50  | 67307                       | 51.64    |
| 2 | 15.609      | 1196341                                  | 52.50  | 63025                       | 48.36    |

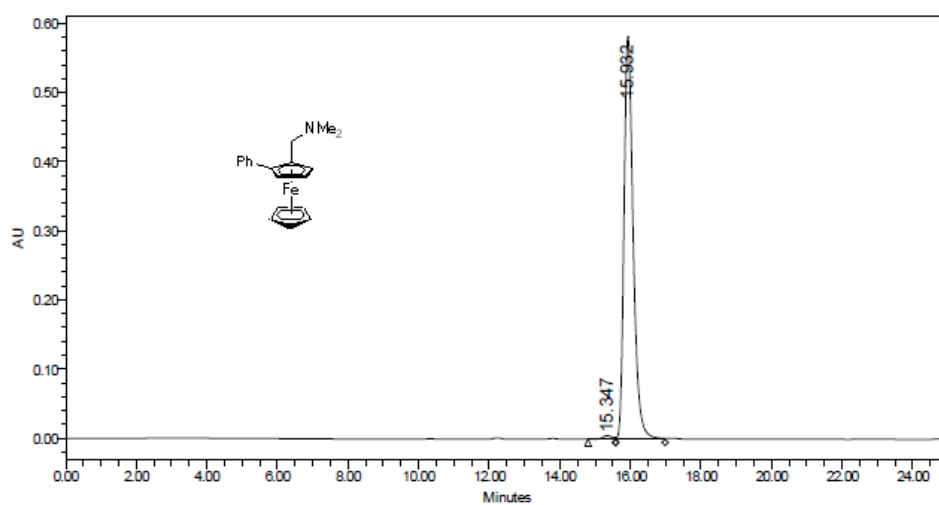

|   | RT<br>(min) | Area<br>( $\mu\text{V}\cdot\text{sec}$ ) | % Area | Height<br>( $\mu\text{V}$ ) | % Height |
|---|-------------|------------------------------------------|--------|-----------------------------|----------|
| 1 | 15.347      | 95079                                    | 0.90   | 5192                        | 0.88     |
| 2 | 15.932      | 10507655                                 | 99.10  | 582706                      | 99.12    |

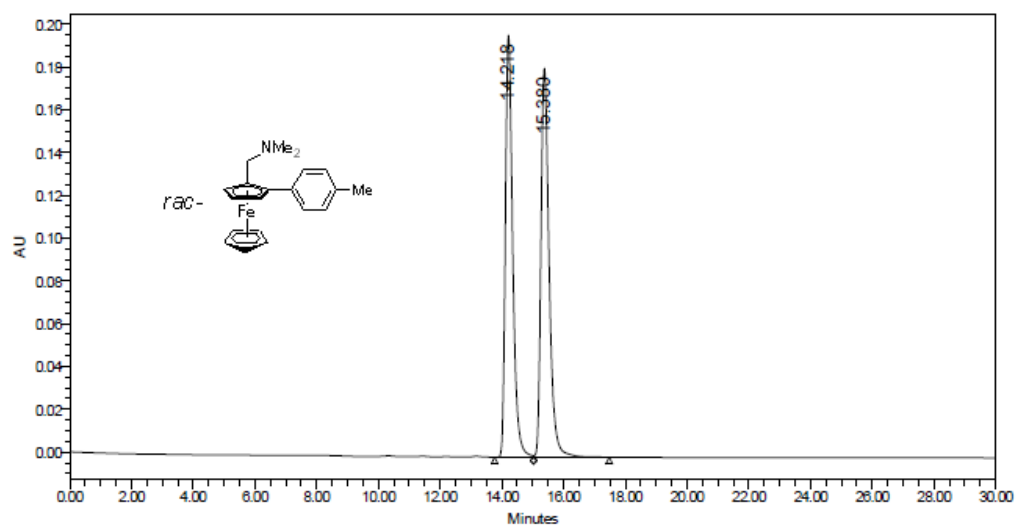

|   | RT<br>(min) | Area<br>( $\mu\text{V}\cdot\text{sec}$ ) | % Area | Height<br>( $\mu\text{V}$ ) | % Height |
|---|-------------|------------------------------------------|--------|-----------------------------|----------|
| 1 | 14.218      | 3246202                                  | 49.30  | 197158                      | 52.04    |
| 2 | 15.380      | 3338075                                  | 50.70  | 181716                      | 47.96    |

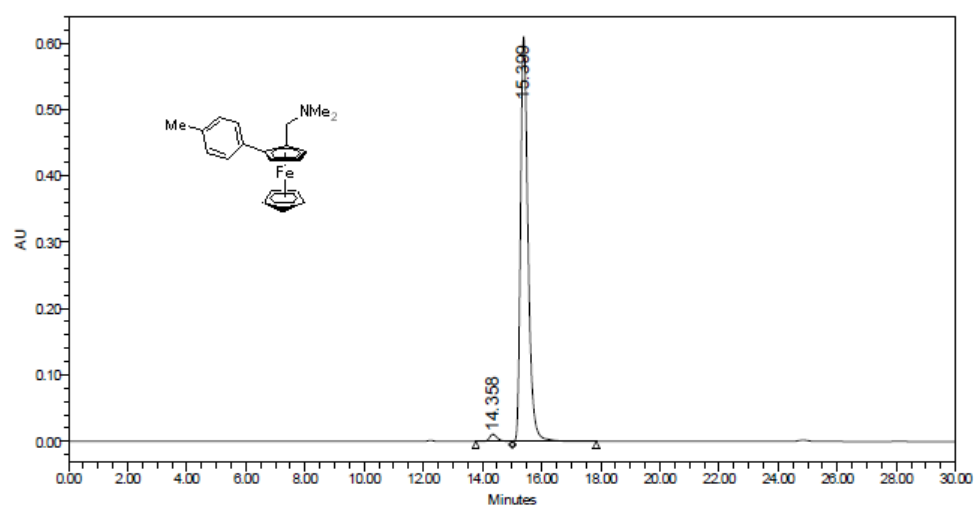

|   | RT<br>(min) | Area<br>( $\mu\text{V}\cdot\text{sec}$ ) | % Area | Height<br>( $\mu\text{V}$ ) | % Height |
|---|-------------|------------------------------------------|--------|-----------------------------|----------|
| 1 | 14.358      | 191614                                   | 1.75   | 10688                       | 1.72     |
| 2 | 15.399      | 10743350                                 | 98.25  | 609479                      | 98.28    |



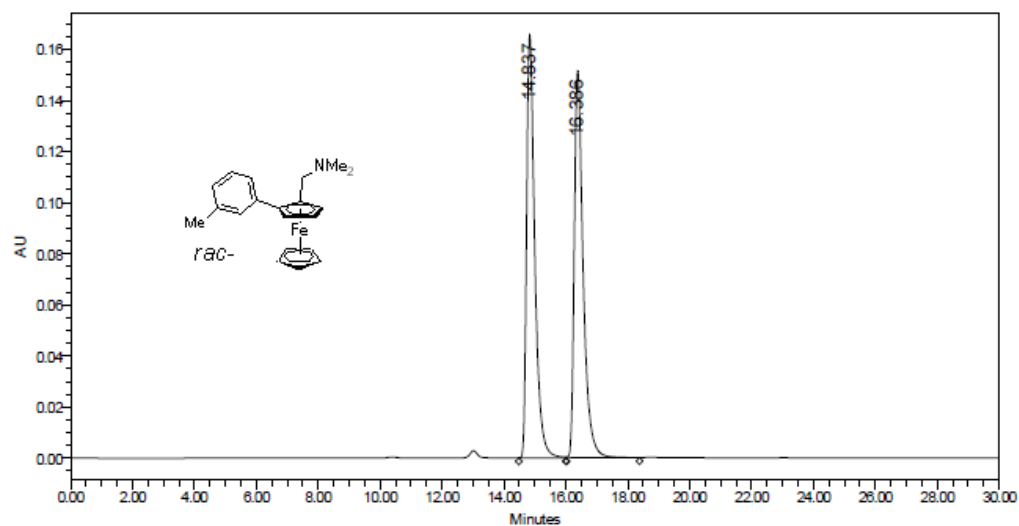

|   | RT<br>(min) | Area<br>( $\mu\text{V}\cdot\text{sec}$ ) | % Area | Height<br>( $\mu\text{V}$ ) | % Height |
|---|-------------|------------------------------------------|--------|-----------------------------|----------|
| 1 | 14.837      | 3036002                                  | 50.15  | 165870                      | 52.26    |
| 2 | 16.386      | 3018105                                  | 49.85  | 151544                      | 47.74    |

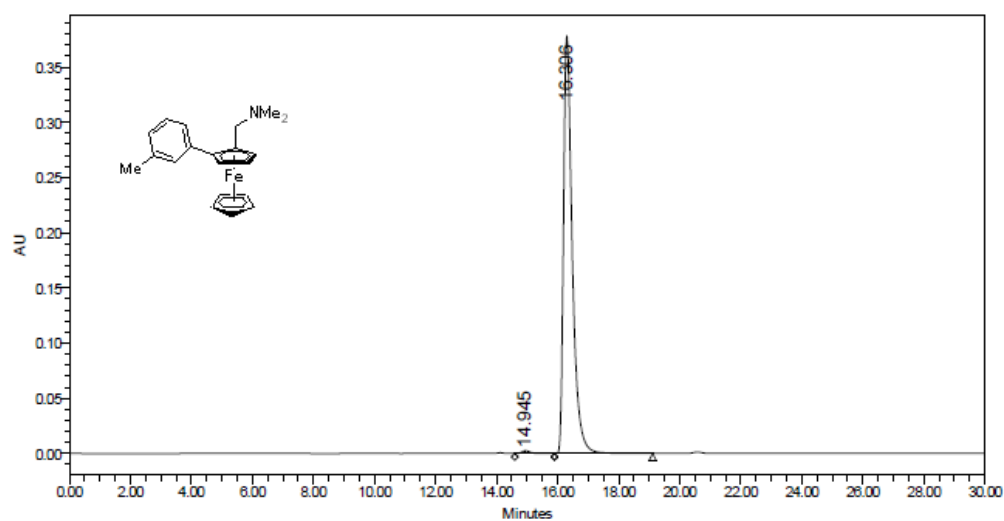

|   | RT<br>(min) | Area<br>( $\mu\text{V}\cdot\text{sec}$ ) | % Area | Height<br>( $\mu\text{V}$ ) | % Height |
|---|-------------|------------------------------------------|--------|-----------------------------|----------|
| 1 | 14.945      | 48952                                    | 0.65   | 2569                        | 0.67     |
| 2 | 16.306      | 7524140                                  | 99.35  | 378712                      | 99.33    |

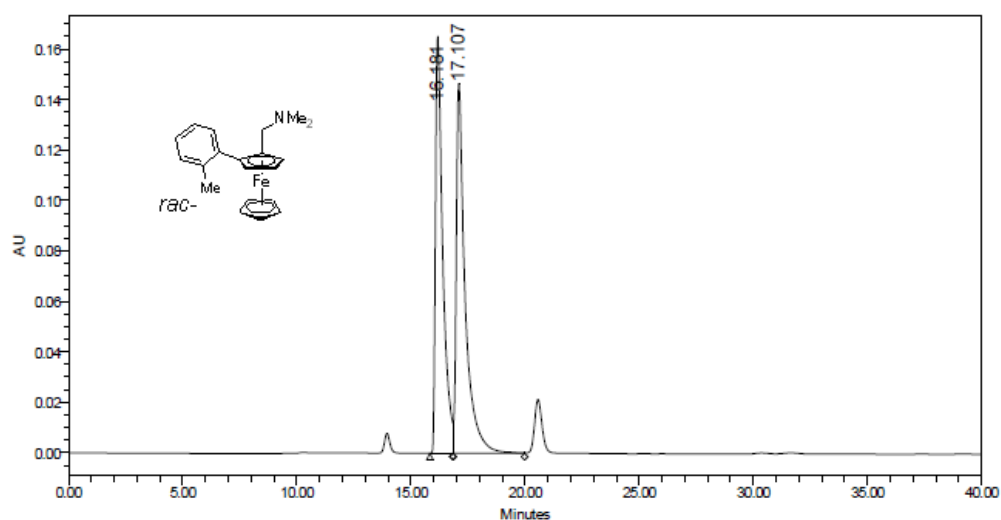

|   | RT<br>(min) | Area<br>( $\mu\text{V}\cdot\text{sec}$ ) | % Area | Height<br>( $\mu\text{V}$ ) | % Height |
|---|-------------|------------------------------------------|--------|-----------------------------|----------|
| 1 | 16.181      | 3683893                                  | 48.12  | 165245                      | 52.97    |
| 2 | 17.107      | 3972143                                  | 51.88  | 146692                      | 47.03    |

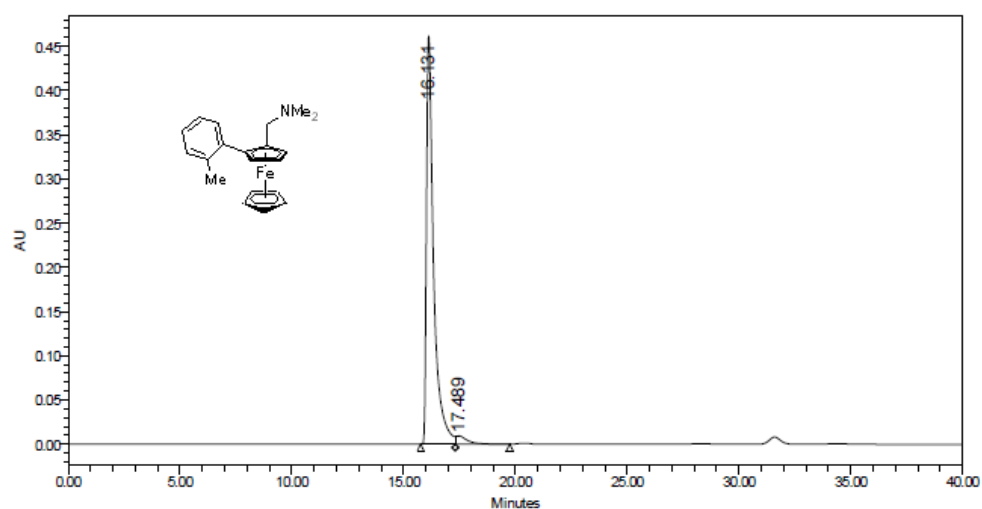

|   | RT<br>(min) | Area<br>( $\mu\text{V}\cdot\text{sec}$ ) | % Area | Height<br>( $\mu\text{V}$ ) | % Height |
|---|-------------|------------------------------------------|--------|-----------------------------|----------|
| 1 | 16.131      | 10273430                                 | 96.82  | 461685                      | 97.99    |
| 2 | 17.489      | 337344                                   | 3.18   | 9476                        | 2.01     |

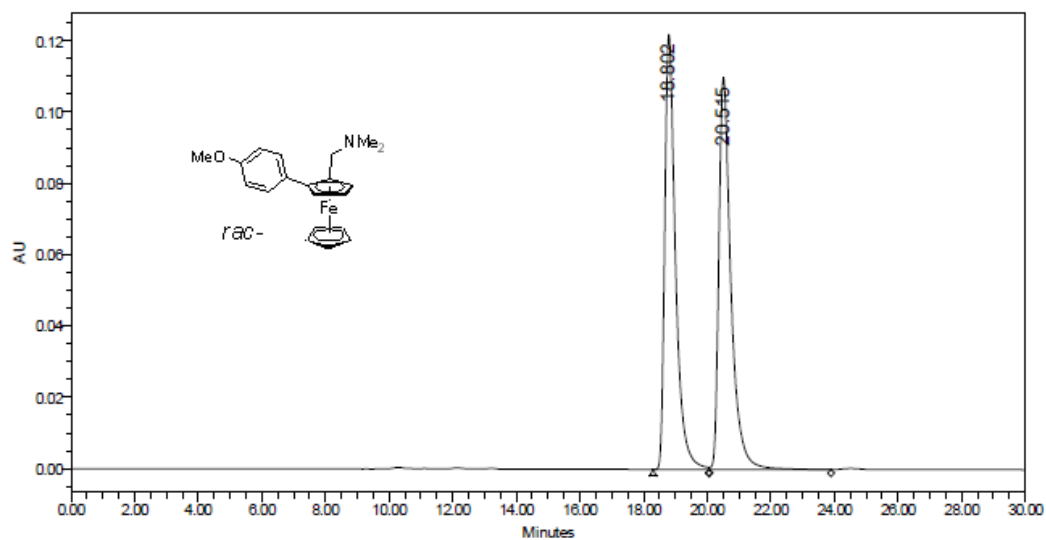

|   | RT (min) | Area (μV*sec) | % Area | Height (μV) | % Height |
|---|----------|---------------|--------|-------------|----------|
| 1 | 18.802   | 2864542       | 49.70  | 121924      | 52.62    |
| 2 | 20.515   | 2898851       | 50.30  | 109799      | 47.38    |

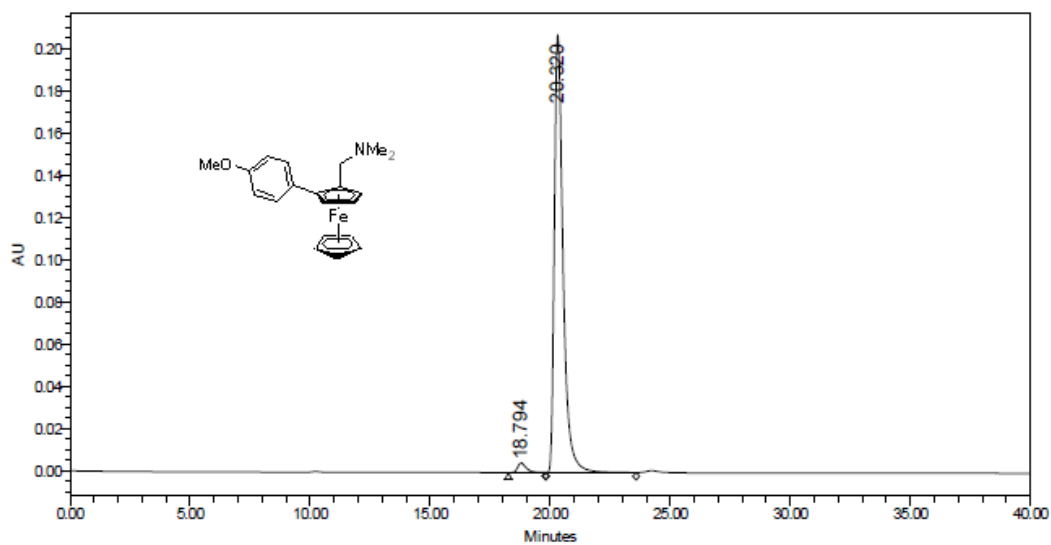

|   | RT (min) | Area (μV*sec) | % Area | Height (μV) | % Height |
|---|----------|---------------|--------|-------------|----------|
| 1 | 18.794   | 116096        | 2.16   | 4485        | 2.12     |
| 2 | 20.320   | 5260322       | 97.84  | 207483      | 97.88    |

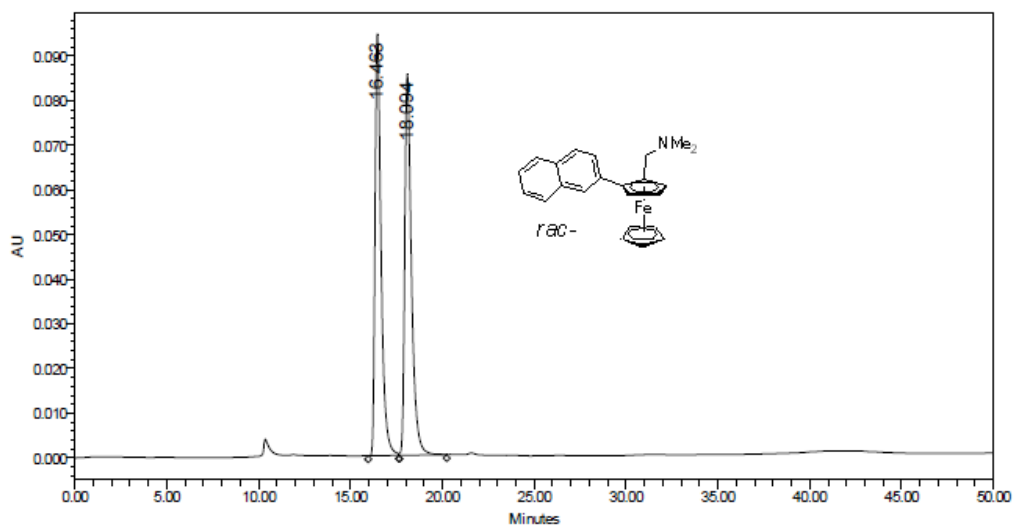

|   | RT<br>(min) | Area<br>( $\mu\text{V}\cdot\text{sec}$ ) | % Area | Height<br>( $\mu\text{V}$ ) | % Height |
|---|-------------|------------------------------------------|--------|-----------------------------|----------|
| 1 | 16.463      | 2160276                                  | 49.93  | 94476                       | 52.52    |
| 2 | 18.094      | 2166318                                  | 50.07  | 85408                       | 47.48    |

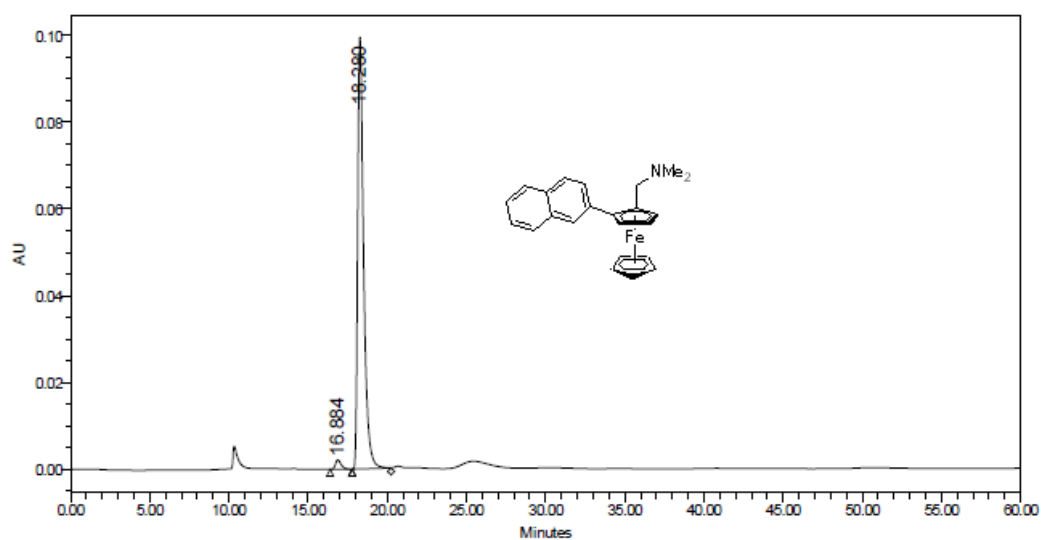

|   | RT<br>(min) | Area<br>( $\mu\text{V}\cdot\text{sec}$ ) | % Area | Height<br>( $\mu\text{V}$ ) | % Height |
|---|-------------|------------------------------------------|--------|-----------------------------|----------|
| 1 | 16.884      | 53752                                    | 2.02   | 2173                        | 2.14     |
| 2 | 18.280      | 2603002                                  | 97.98  | 99454                       | 97.86    |

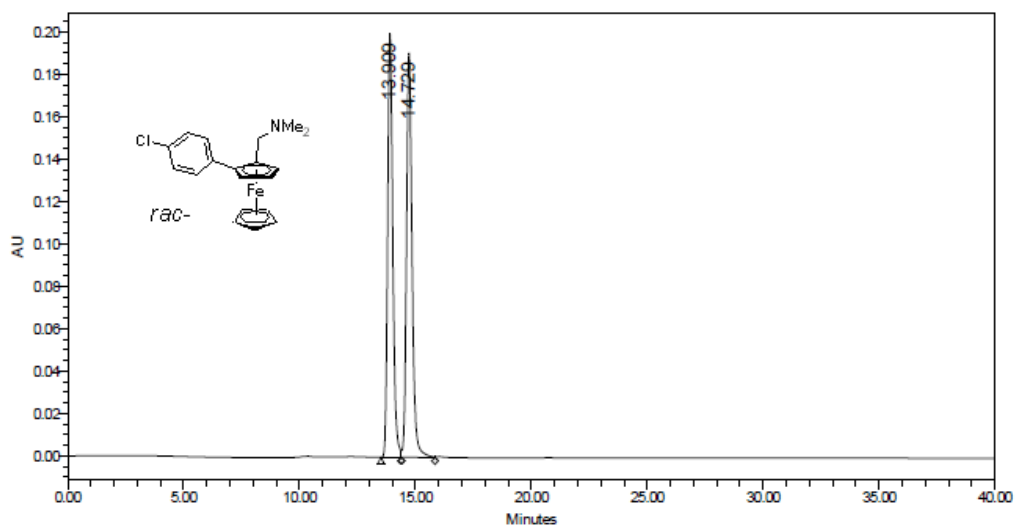

|   | RT (min) | Area (μV*sec) | % Area | Height (μV) | % Height |
|---|----------|---------------|--------|-------------|----------|
| 1 | 13.909   | 3081433       | 49.08  | 200261      | 51.21    |
| 2 | 14.729   | 3196877       | 50.92  | 190801      | 48.79    |

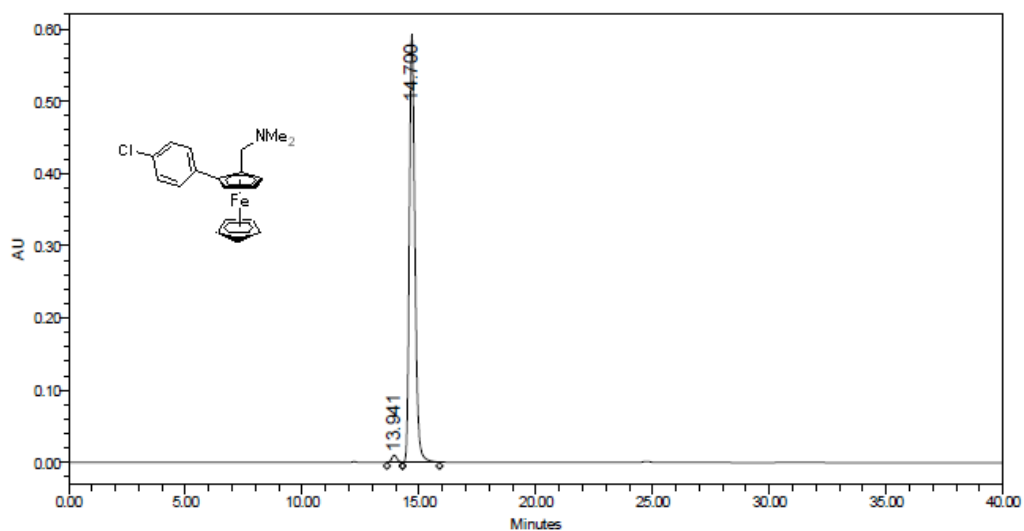

|   | RT (min) | Area (μV*sec) | % Area | Height (μV) | % Height |
|---|----------|---------------|--------|-------------|----------|
| 1 | 13.941   | 162507        | 1.62   | 10116       | 1.68     |
| 2 | 14.700   | 9878645       | 98.38  | 591525      | 98.32    |

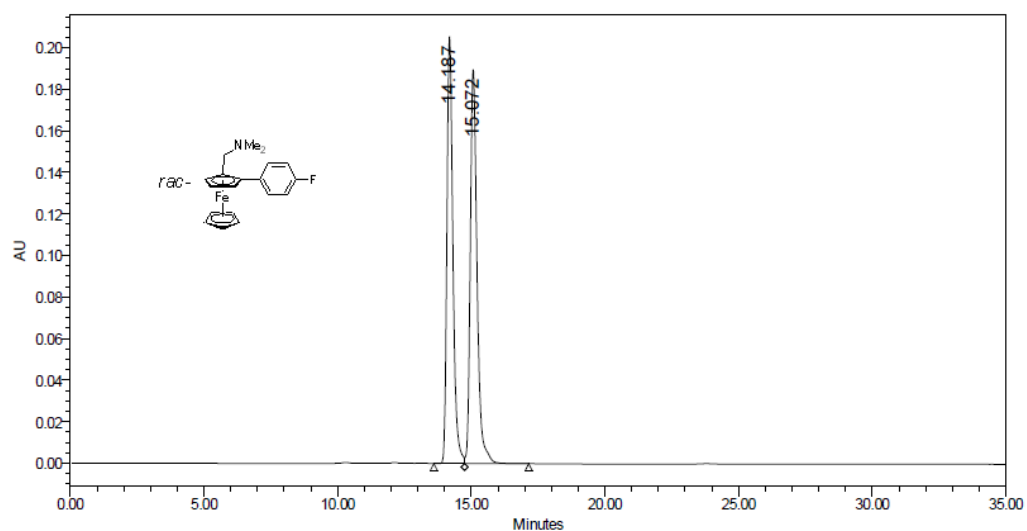

|   | RT<br>(min) | Area<br>( $\mu\text{V}\cdot\text{sec}$ ) | % Area | Height<br>( $\mu\text{V}$ ) | % Height |
|---|-------------|------------------------------------------|--------|-----------------------------|----------|
| 1 | 14.187      | 3206840                                  | 48.96  | 205700                      | 52.01    |
| 2 | 15.072      | 3342871                                  | 51.04  | 189823                      | 47.99    |

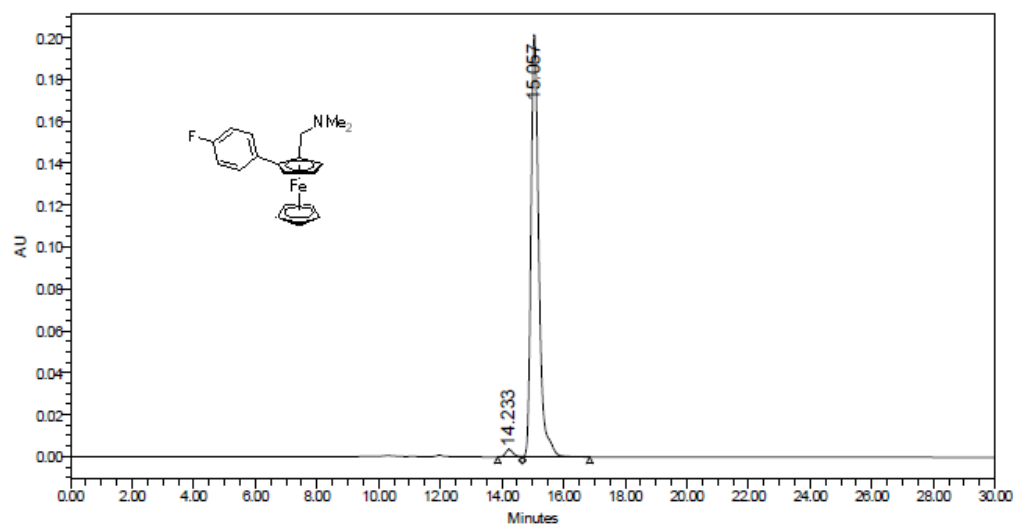

|   | RT<br>(min) | Area<br>( $\mu\text{V}\cdot\text{sec}$ ) | % Area | Height<br>( $\mu\text{V}$ ) | % Height |
|---|-------------|------------------------------------------|--------|-----------------------------|----------|
| 1 | 14.233      | 61140                                    | 1.69   | 3539                        | 1.72     |
| 2 | 15.057      | 3567058                                  | 98.31  | 201826                      | 98.28    |

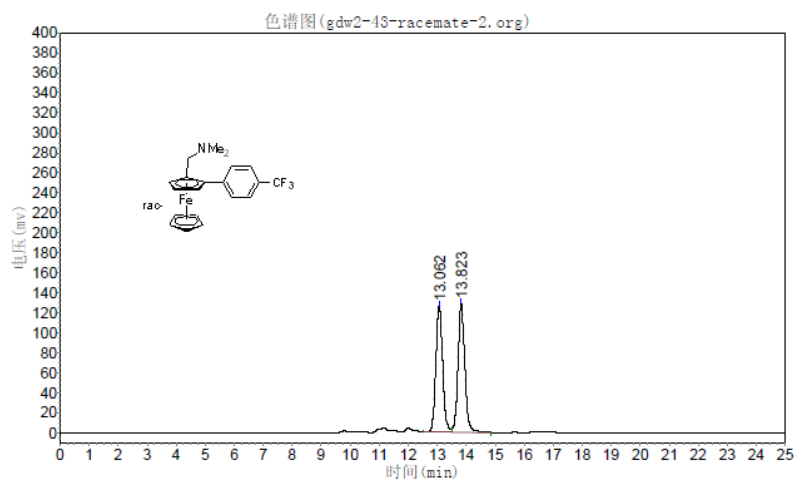

| NO. | Time   | Height     | Area        | Percent  |
|-----|--------|------------|-------------|----------|
| 1   | 13.062 | 126262.297 | 2059025.750 | 49.2573  |
| 2   | 13.823 | 129310.391 | 2121119.750 | 50.7427  |
|     |        | 255572.688 | 4180145.500 | 100.0000 |

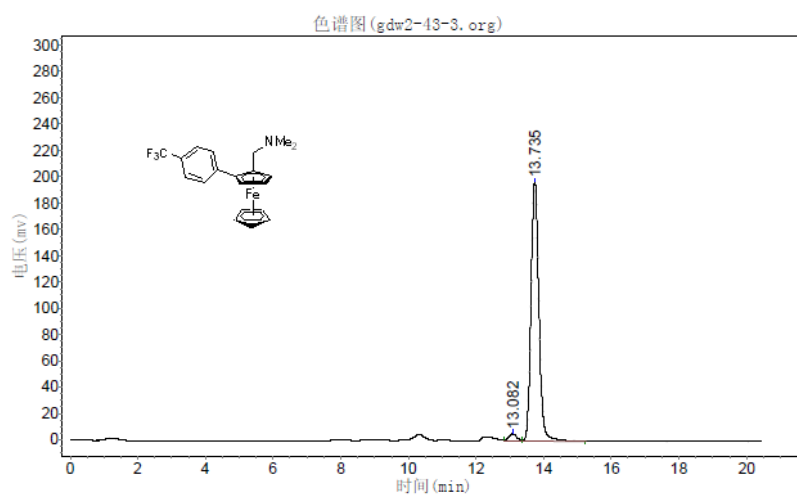

| NO. | Time   | Height     | Area        | Percent  |
|-----|--------|------------|-------------|----------|
| 1   | 13.082 | 5602.569   | 95153.945   | 2.9033   |
| 2   | 13.735 | 197002.766 | 3182240.500 | 97.0967  |
|     |        | 202605.335 | 3277394.445 | 100.0000 |

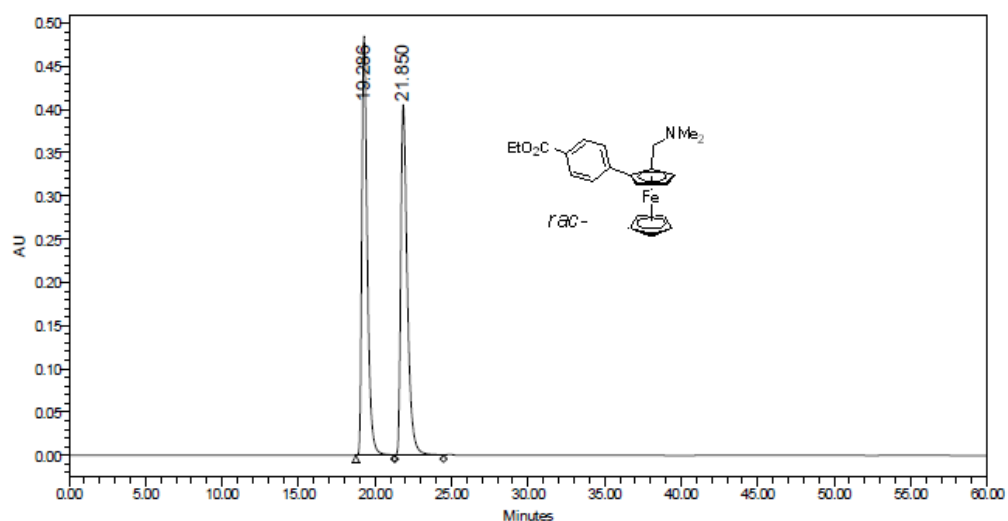

|   | RT<br>(min) | Area<br>( $\mu\text{V}\cdot\text{sec}$ ) | % Area | Height<br>( $\mu\text{V}$ ) | %<br>Height |
|---|-------------|------------------------------------------|--------|-----------------------------|-------------|
| 1 | 19.286      | 12012204                                 | 49.77  | 485166                      | 54.47       |
| 2 | 21.850      | 12122879                                 | 50.23  | 405588                      | 45.53       |

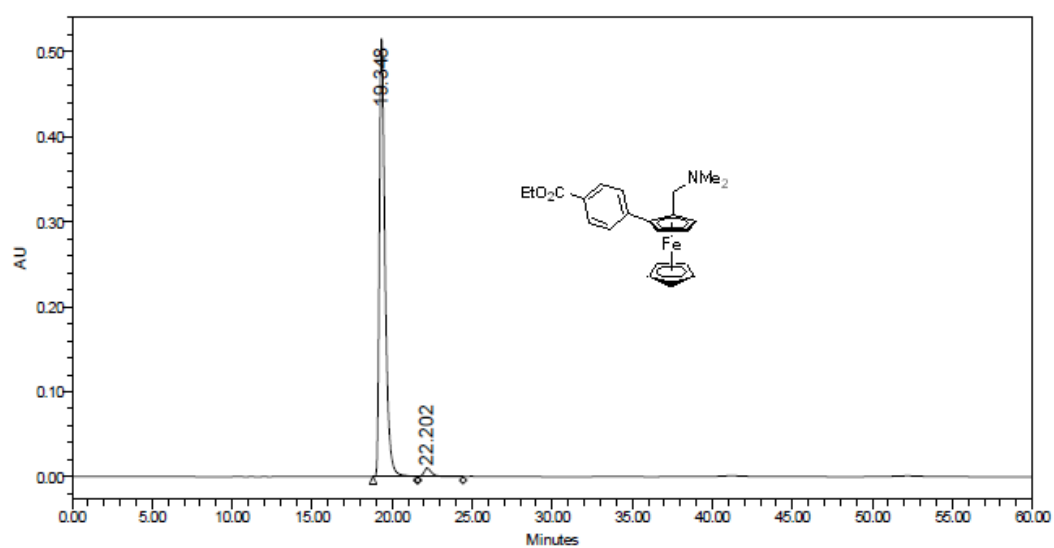

|   | RT<br>(min) | Area<br>( $\mu\text{V}\cdot\text{sec}$ ) | % Area | Height<br>( $\mu\text{V}$ ) | %<br>Height |
|---|-------------|------------------------------------------|--------|-----------------------------|-------------|
| 1 | 19.348      | 12799916                                 | 97.32  | 515302                      | 98.10       |
| 2 | 22.202      | 352406                                   | 2.68   | 9972                        | 1.90        |



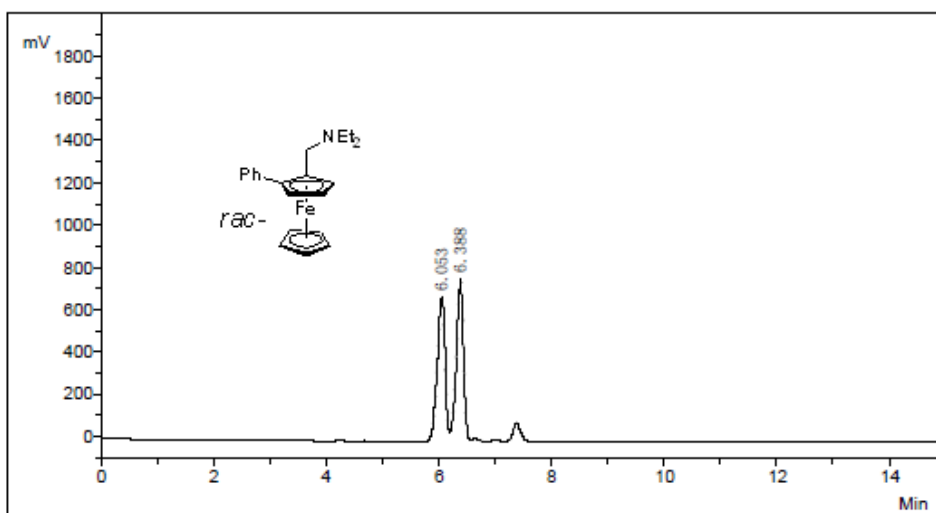

| No.   | PeakNo | ID. Name | R. Time | PeakHeight | PeakArea   | PerCent  |
|-------|--------|----------|---------|------------|------------|----------|
| 1     | 1      |          | 6.053   | 670736.9   | 6496442.6  | 49.6486  |
| 2     | 2      |          | 6.388   | 754749.2   | 6588415.9  | 50.3514  |
| Total |        |          |         | 1425486.1  | 13084858.5 | 100.0000 |

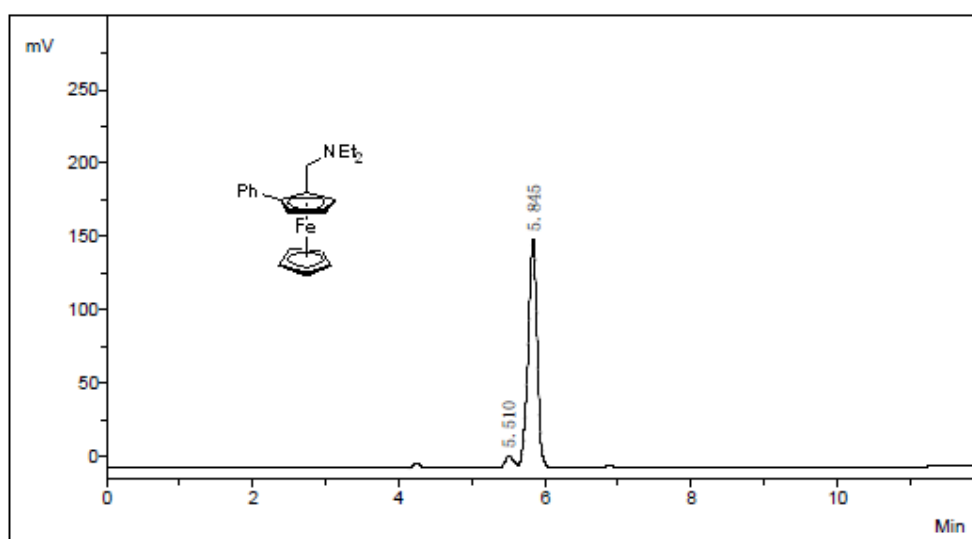

| No.   | PeakNo | ID. Name | R. Time | PeakHeight | PeakArea  | PerCent  |
|-------|--------|----------|---------|------------|-----------|----------|
| 1     | 1      |          | 5.510   | 7964.6     | 63290.5   | 4.5295   |
| 2     | 2      |          | 5.845   | 155872.8   | 1333993.5 | 95.4705  |
| Total |        |          |         | 163837.4   | 1397284.0 | 100.0000 |

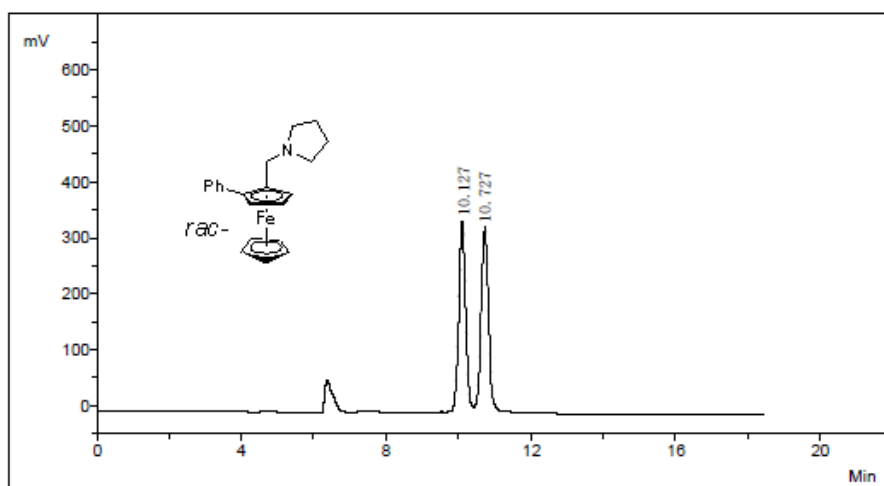

| No.   | PeakNo | ID. Name | R. Time | PeakHeight | PeakArea  | PerCent  |
|-------|--------|----------|---------|------------|-----------|----------|
| 1     | 1      |          | 10.127  | 336782.5   | 4592806.2 | 49.0314  |
| 2     | 2      |          | 10.727  | 328692.5   | 4774262.7 | 50.9686  |
| Total |        |          |         | 665475.0   | 9367068.9 | 100.0000 |

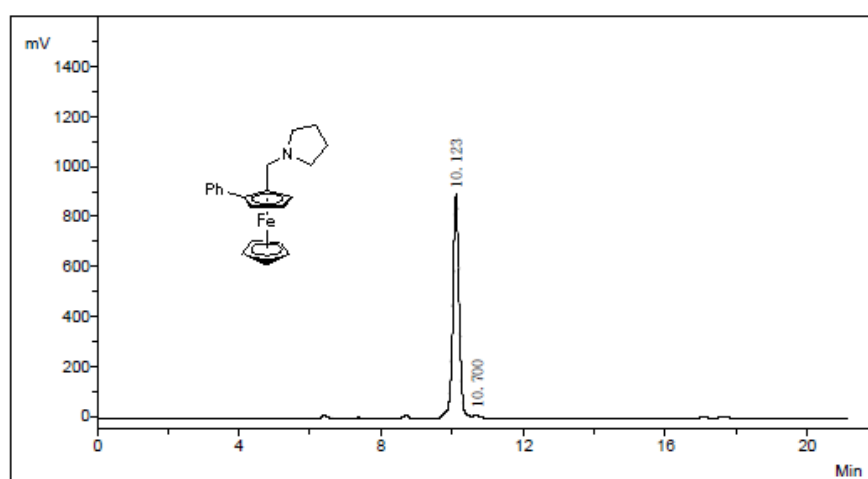

| No.   | PeakNo | ID. Name | R. Time | PeakHeight | PeakArea   | PerCent  |
|-------|--------|----------|---------|------------|------------|----------|
| 1     | 1      |          | 10.123  | 890498.4   | 11167632.6 | 98.8684  |
| 2     | 2      |          | 10.700  | 9009.2     | 127816.4   | 1.1316   |
| Total |        |          |         | 899507.6   | 11295449.0 | 100.0000 |

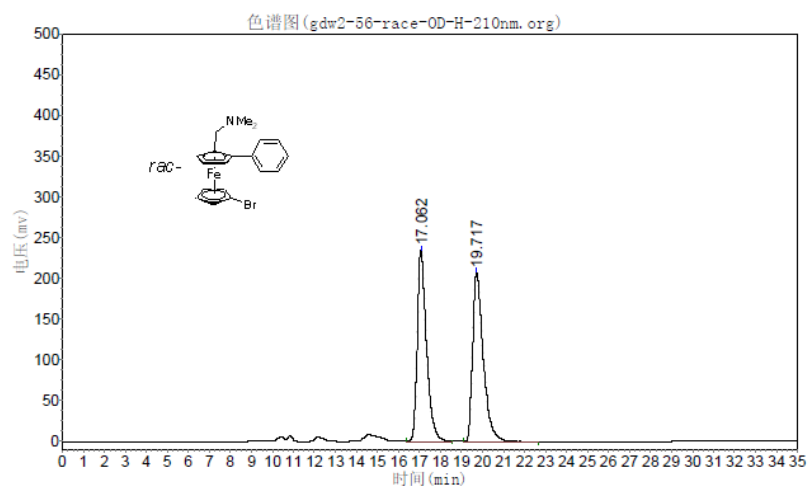

| NO. | Time   | Height     | Area         | Percent  |
|-----|--------|------------|--------------|----------|
| 1   | 17.062 | 235543.578 | 7248012.000  | 49.2302  |
| 2   | 19.717 | 208333.734 | 7474683.000  | 50.7698  |
|     |        | 443877.313 | 14722695.000 | 100.0000 |

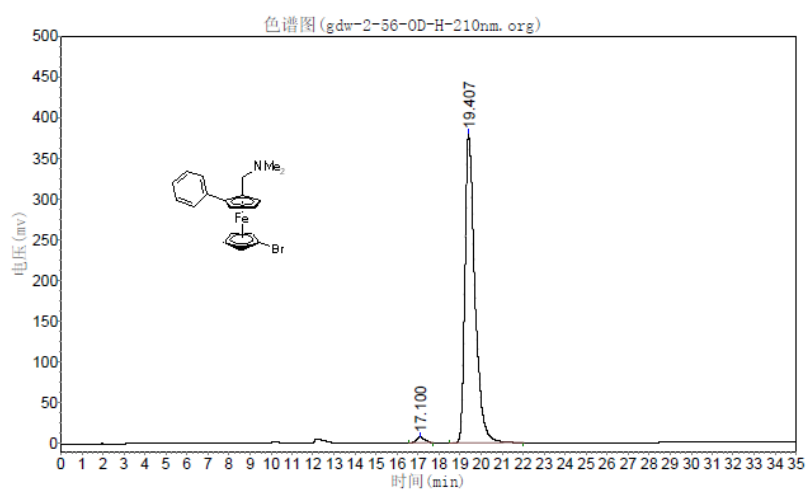

| NO. | Time   | Height     | Area         | Percent  |
|-----|--------|------------|--------------|----------|
| 1   | 17.100 | 6840.289   | 180528.297   | 1.4142   |
| 2   | 19.407 | 379586.875 | 12584795.000 | 98.5858  |
|     |        | 386427.164 | 12765323.297 | 100.0000 |

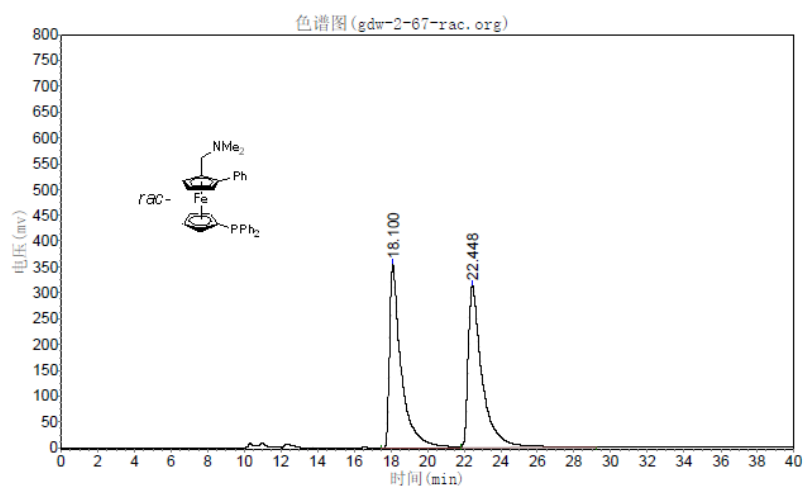

| NO. | Time   | Height     | Area         | Percent  |
|-----|--------|------------|--------------|----------|
| 1   | 18.100 | 357102.250 | 15758846.000 | 48.7153  |
| 2   | 22.448 | 315193.781 | 16590040.000 | 51.2847  |
|     |        | 672296.031 | 32348886.000 | 100.0000 |

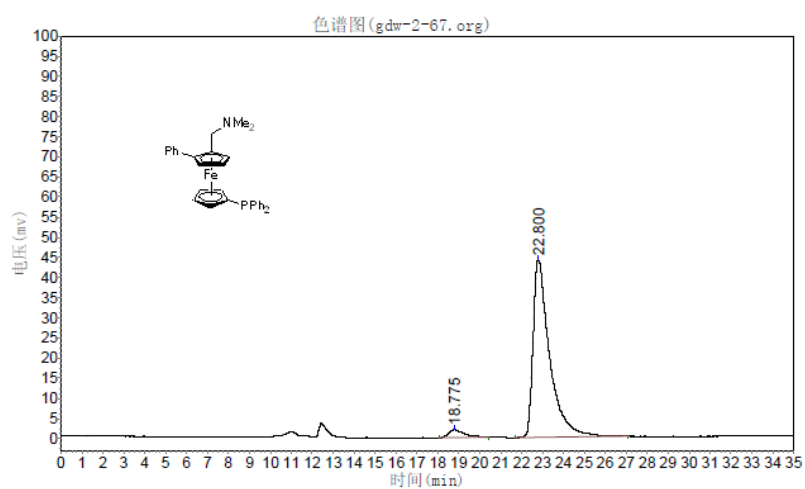

| NO. | Time   | Height    | Area        | Percent  |
|-----|--------|-----------|-------------|----------|
| 1   | 18.775 | 1873.883  | 99021.203   | 3.9278   |
| 2   | 22.800 | 44000.984 | 2422027.000 | 96.0722  |
|     |        | 45874.867 | 2521048.203 | 100.0000 |

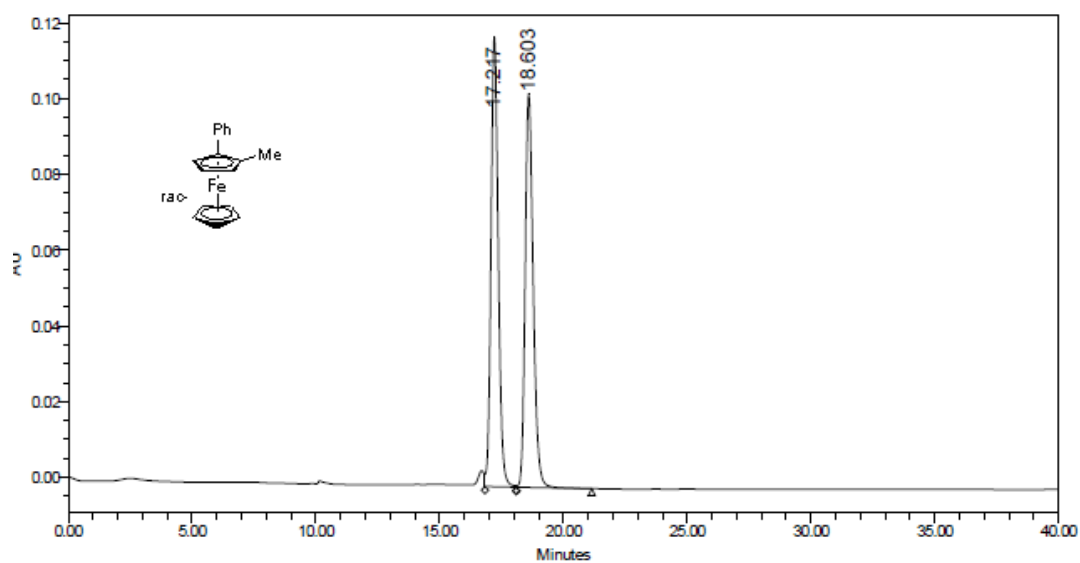

|   | RT<br>(min) | Area<br>( $\mu\text{V}\cdot\text{sec}$ ) | % Area | Height<br>( $\mu\text{V}$ ) | % Height |
|---|-------------|------------------------------------------|--------|-----------------------------|----------|
| 1 | 17.217      | 2402009                                  | 50.51  | 118571                      | 53.29    |
| 2 | 18.603      | 2353490                                  | 49.49  | 103938                      | 46.71    |

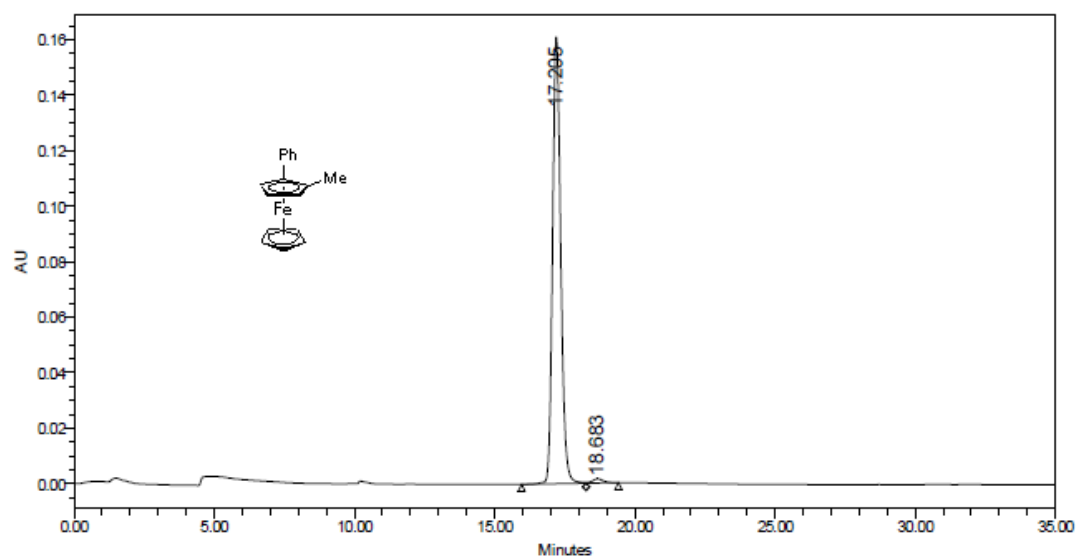

|   | RT<br>(min) | Area<br>( $\mu\text{V}\cdot\text{sec}$ ) | % Area | Height<br>( $\mu\text{V}$ ) | % Height |
|---|-------------|------------------------------------------|--------|-----------------------------|----------|
| 1 | 17.205      | 3251971                                  | 98.80  | 161126                      | 99.09    |
| 2 | 18.683      | 39415                                    | 1.20   | 1488                        | 0.91     |

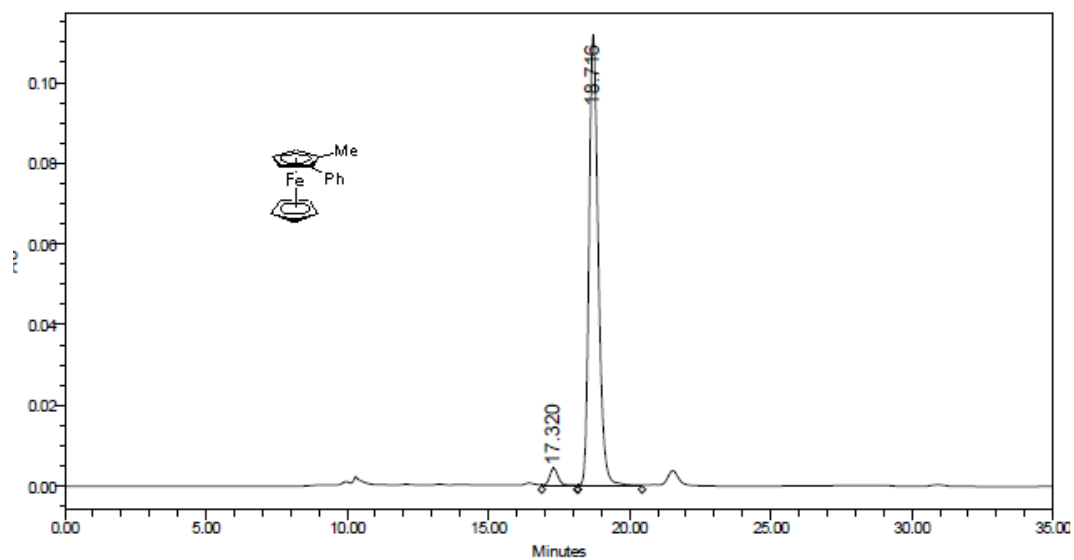

|   | RT<br>(min) | Area<br>( $\mu\text{V}\cdot\text{sec}$ ) | % Area | Height<br>( $\mu\text{V}$ ) | %<br>Height |
|---|-------------|------------------------------------------|--------|-----------------------------|-------------|
| 1 | 17.320      | 97940                                    | 3.70   | 4358                        | 3.76        |
| 2 | 18.716      | 2545602                                  | 96.30  | 111562                      | 96.24       |

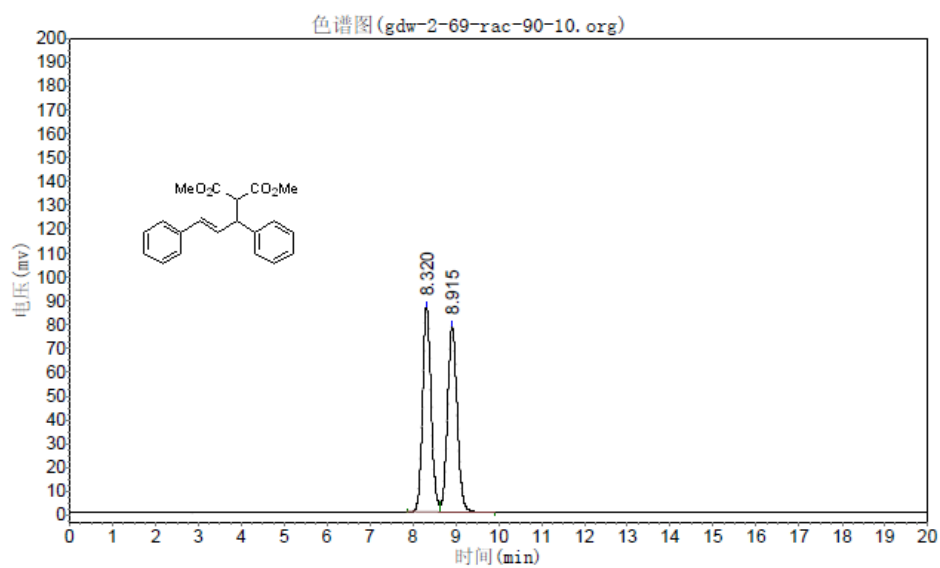

| No. | Time  | Height     | Area        | Percent  |
|-----|-------|------------|-------------|----------|
| 1   | 8.320 | 85921.734  | 1200669.500 | 49.6353  |
| 2   | 8.915 | 78175.141  | 1218312.125 | 50.3647  |
|     |       | 164096.875 | 2418981.625 | 100.0000 |

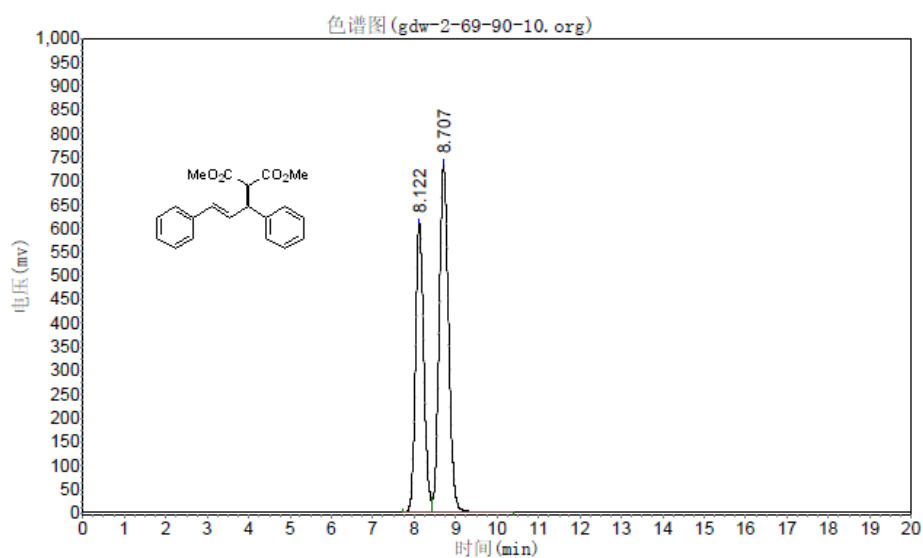

| No. | Time  | Height      | Area         | Percent  |
|-----|-------|-------------|--------------|----------|
| 1   | 8.122 | 608668.500  | 8568984.000  | 42.6514  |
| 2   | 8.707 | 733313.313  | 11521746.000 | 57.3486  |
|     |       | 1341981.813 | 20090730.000 | 100.0000 |
